# Supplementary material
Source: PubMed Central journal article supplement (PMC3057353)
Supplement: NIHMS258178-supplement-01.pdf [file NIHMS258178-supplement-01.pdf]

## **MAGI-3 competes with NHERF-2 to negative regulate LPA<sub>2</sub> receptor signaling in colon cancer cells**

**Sei-Jung Lee, Stefanie L. Ritter, Huanchun Zhang, Hyunsuk Shim, Randy A. Hall, and C. Chris Yun**

### **Supplementary Materials and Methods**

#### ***Antibodies:***

The generation of rabbit anti-NHERF-2 polyclonal antibody and mouse anti-VSVG monoclonal antibody was described previously<sup>1</sup>. Rabbit anti-V5 polyclonal was purchase from Covance (Princeton, NJ), and mouse anti- MAGI-3 monoclonal and mouse anti- Gα<sub>q</sub> monoclonal antibodies were from BD Biosciences (San Diego, CA). Mouse anti-Flag monoclonal was obtained from Sigma (St. Louis, MO). Rabbit anti-PLC-β3 polyclonal, rabbit anti-Gα<sub>12</sub> polyclonal, rabbit anti-Gα<sub>i</sub> polyclonal, mouse anti-IκBα monoclonal, rabbit anti-phospho-IκBα monoclonal, rabbit anti-NF-κBp65 polyclonal, mouse anti-β-actin monoclonal, mouse anti-phospho-JNK monoclonal, rabbit anti-JNK monoclonal, rabbit anti-phospho-c-Jun polyclonal, and rabbit anti-c-Jun monoclonal antibodies were obtained from Cell Signaling (Danvers, MA).

#### ***Inositol phosphates (IP) generation:***

Cells were labeled with 1 μCi of myo-[<sup>3</sup>H]-inositol (PerkinElmer, Waltham, MA) in 2 mL of serum-free medium for 24 h as previously described<sup>2</sup>. Labeled cells were treated with 20 mM LiCl for 15 min, followed by treatment with 1μM LPA for 20 min. Cells were resuspendend in 1.2 mL H<sub>2</sub>O and extracted in 1.8 mL chloroform/methanol (1:2, v/v), and the upper phase was applied to a Dowex AG 1-X8 anion exchange column (Bio-Rad). The column was washed with 4 mL H<sub>2</sub>O and then with 10 mL of 60 mM ammonium formate/5 mM sodium tetraborate. The accumulated myo-[<sup>3</sup>H]-inositol

phosphates were eluted with 2 mL of 1 M ammonium formate/0.1 M formic acid. Radioactivity was measured with a  $\beta$ -scintillation counter.

**Western immunoblot and immunoprecipitation:** Western blotting and immunoprecipitation was performed as previously described <sup>10</sup>. To investigate the interaction between MAGI-3 and PLC- $\beta$  isotypes, HCT116 cells were co-transfected using Lipofectamine 2000 (Invitrogen, Carlsbad, CA) with pcDNA3.1/V5-His-MAGI-3 and Flag-PLC $\beta$  isotypes. The monoclonal anti-V5, monoclonal anti-MAGI-3, and polyclonal anti-Oct-1 antibodies were from Covance, BD Biosciences, Abcam (Cambridge, MA), respectively. Isolation of cytoplasmic proteins for the detection of I $\kappa$ B $\alpha$  and nuclear proteins for the detection of NF- $\kappa$ Bp65 were done using NE-PER Nuclear and Cytoplasmic Extraction Reagents Kit (Pierce, Rockford, IL). Co-immunoprecipitation of LPA<sub>2</sub>, MAGI-3, NHERF-2, and PLC- $\beta$ 3 was performed using the Catch and Release System (Millipore, Billerica, MA) according to the manufacturer's instructions.

**Cell Surface Expression Assay:** The expression level of LPA<sub>2</sub> on the plasma membrane was quantified as described <sup>13</sup>. HCT116 cells stably expressing VSVG-LPA<sub>2</sub> were transfected with either MAGI-3 siRNA or NHERF-2 siRNA. The cells were washed with PBS, fixed in 4% paraformaldehyde, and blocked in PBS containing 2% nonfat dry milk for at least 30 min. Cells were incubated with an anti-VSVG antibody for 2 h at room temperature and treated with horseradish peroxidase-conjugated secondary antibody for 1 h. After three 15 min washes with PBS, cells were incubated with SuperSignal ELISA ECL reagent for 15 s. The luminescence, which corresponds to the amount of LPA<sub>2</sub> on the cell surface, was determined by using a TD 20/20 luminometer (Turner Designs, Sunnyvale, CA).

**Immunohistochemical analysis of colon tissue array:**

Human colon tissue array slides (IMH-359) were purchased from Imgenex. Immunohistochemical labeling was performed as previously described <sup>3</sup>, except that

after the incubation with biotinylated secondary antibody solution the slides were incubated for 6 min with a diaminobenzidine tetrahydrochlorine substrate (DAB+, Dako), counterstained with hematoxylin, and dehydrated. The expression levels of MAGI-3 and NHERF-2 in tissue microarrays were quantified according to the published methods<sup>4, 5</sup>. Histological scoring of MAGI-3 and NHERF-2 expression was performed independently by two co-authors. Briefly, the intensity of cytoplasmic and plasma membrane immunostaining was subjectively scored on a scale of 0 (no staining) to 3 (strongest intensity), and the percentage of cells positively stained at the cytoplasm or plasma membrane was estimated at each intensity. The percentage of cells (from 0 to 100) was multiplied by the corresponding immunostaining intensity (from 0 to 3) to obtain histological scores ranging from 0 to 300. All tissue microarray experiments were repeated 3 times and the replicated results of each author were averaged.

### References for Supplementary

1. Yun, CH, Lamprecht, G, Forster, DV, et al. NHE3 kinase A regulatory protein E3KARP binds the epithelial brush border Na<sup>+</sup>/H<sup>+</sup> exchanger NHE3 and the cytoskeletal protein ezrin. *J Biol Chem* 1998;273:25856-25863.
2. Berridge, MJ, Downes, CP, Hanley, MR. Lithium amplifies agonist-dependent phosphatidylinositol responses in brain and salivary glands. *Biochem J* 1982;206:587-595.
3. Lin, S, Wang, D, Iyer, S, et al. The absence of LPA2 attenuates tumor formation in an experimental model of colitis-associated cancer. *Gastroenterology* 2009;136:1711-1720.
4. Buck, E, Eyzaguirre, A, Barr, S, et al. Loss of homotypic cell adhesion by epithelial-mesenchymal transition or mutation limits sensitivity to epidermal growth factor receptor inhibition. *Mol Cancer Ther* 2007;6:532-541.
5. Wang, Q, Sun, Z, Yang, HS. Downregulation of tumor suppressor Pcd4 promotes invasion and activates both  $\beta$ -catenin/Tcf and AP-1-dependent transcription in colon carcinoma cells. *Oncogene* 2008;27:1527-1535.
6. Lin, S, Lee, SJ, Shim, H, et al. The Absence of LPA receptor 2 Reduces the Tumorigenesis by Apc<sup>Min</sup> Mutation in the Intestine. *Am J Physiol Gastrointest Liver Physiol* 2010. in press.

## **SUPPLEMENTARY FIGURE LEGENDS**

### **Supplementary Figure S1: MAGI-3 negatively regulates cell migration and invasion of HCT116 cells.**

(A) HCT116 cells stably transfected with pLPCX or pLPCX/LPA<sub>2</sub> were seeded and serum-starved for 24 h. Cell-free regions were created by scraping with a pipet tip. Cells were then incubated in serum-free media supplemented with 1  $\mu$ M or 10  $\mu$ M of LPA. Migration of cells into cell-free areas was visualized. Cell migration of (B) HCT116/LPA<sub>2</sub> siRNA, (C) HCT116/NHERF-2 and HCT116/MAGI-3, and (D) HCT116/NHERF-2 siRNA and HCT116/MAGI-3 siRNA was determined. Representative figures from 3 independent experiments are shown. Data are represented as the means  $\pm$  S.E. Scale bars; 200  $\mu$ m (E) Invasive capacity of HCT116/pcDNA, HCT116/NHERF-2 and HCT116/MAGI-3 cells was assessed in BioCoat Matrigel Invasion Chambers with 8.0  $\mu$ m pore membranes. Cells were removed from the upper chamber with a cotton swab and the cells that invaded the lower surface of the membrane were stained with H&E. Representative figures from 3 independent experiments are shown. Data are represented as the means  $\pm$  S.E. Scale bars; 20  $\mu$ m. (F) Cell invasion of SW480 cells transfected with pcDNA or pcDNA/MAGI-3 was determined.

### **Supplementary Figure S2: LPA-induced invasion of colon cancer cells is dependent on PLC activity.**

LPA-induced invasion of HCT116 cells was determined in the presence or absence of the PLC inhibitor U73122 (5  $\mu$ M). LPA-induced migration of HCT116 cells was abrogated in the presence of the PLC inhibitor U73122, suggesting that LPA-induced cell invasion is PLC-dependent. Scale bars; 20  $\mu$ m. Quantification of cell invasion is shown on the right. n = 3.

### **Supplementary Figure S3: MAGI-3 inhibits PLC activation induced by ATP.**

HCT116 cells transfected with (A) pcDNA or pcDNA-MAGI-3, or (B) control or MAGI-3 siRNA were treated with 10  $\mu$ M ATP and the amounts of IPs generated were determined. The PLC activity was measured as described earlier. n = 3.

**Supplementary Figure S4: MAGI-3 and NHERF-2 do not alter the amount of total G $\alpha$  protein mediated by LPA<sub>2</sub>.**

(A) LPA-induced binding of [<sup>35</sup>S]GTP $\gamma$ -S in HCT116 cells transfected with control vector pLPCX or pLPCX/VSVG-LPA<sub>2</sub> was determined as described in Methods. n = 4. (B) The effects of NHERF-2 or MAGI-3 overexpression on the binding of [<sup>35</sup>S]GTP- $\gamma$ -S induced by LPA were determined.

**Supplementary Figure S5: The effects of inhibitors on LPA-induced activation of NF- $\kappa$ B and JNK.**

(A) HCT116 cells were pretreated with NBD peptide (10  $\mu$ M) for 12 h, SP600125 (5  $\mu$ M) for 3 h, or Gö6976 (1  $\mu$ M) for 30 min prior to LPA treatment for 24 h. Cell invasion was detected by a Matrigel invasion assay as described in Methods. The panel on the right shows quantification of cell invasion. n = 3. (B) HCT116 cells were treated with LPA in the presence of SP600125 or U73122. Phosphorylation of I $\kappa$ B $\alpha$  was determined by Western blotting. (C) Cells were treated with LPA in the presence of U73122 or NBD, and phosphorylation of JNK was determined. n = 3 for each experimental set. (D) The effect of the PKC inhibitor Gö6976 on phosphorylation of c-Jun was determined. n = 3 for each experimental set.

**Supplementary Figure S6: The phosphorylation level of I $\kappa$ B $\alpha$  is reduced in mouse tumors in the absence of LPA<sub>2</sub>**

The phosphorylation level of I $\kappa$ B $\alpha$  was determined in mouse intestinal tumors. The mouse intestinal lysates were from our published studies<sup>3, 6</sup>. (A) Equal amounts of lysates prepared from intestinal epithelial cells of WT or LPA<sub>2</sub>-deficient (*Lpar2*<sup>-/-</sup>) and adenomas of *Apc*<sup>Min/+</sup> or *Apc*<sup>Min/+</sup>/*Lpar2*<sup>-/-</sup> mice were analyzed for phosphorylation levels of I $\kappa$ B $\alpha$ . The expression levels of total I $\kappa$ B $\alpha$  from each sample are shown in the bottom panel. (B) The expression levels of phosphorylated and total I $\kappa$ B $\alpha$  in intestinal lysates of WT and *Lpar2*<sup>-/-</sup> treated with azoxymethane (AOM) and dextran sodium sulfate (DSS) or not are shown. Representative results from 3 independent experiments are shown.



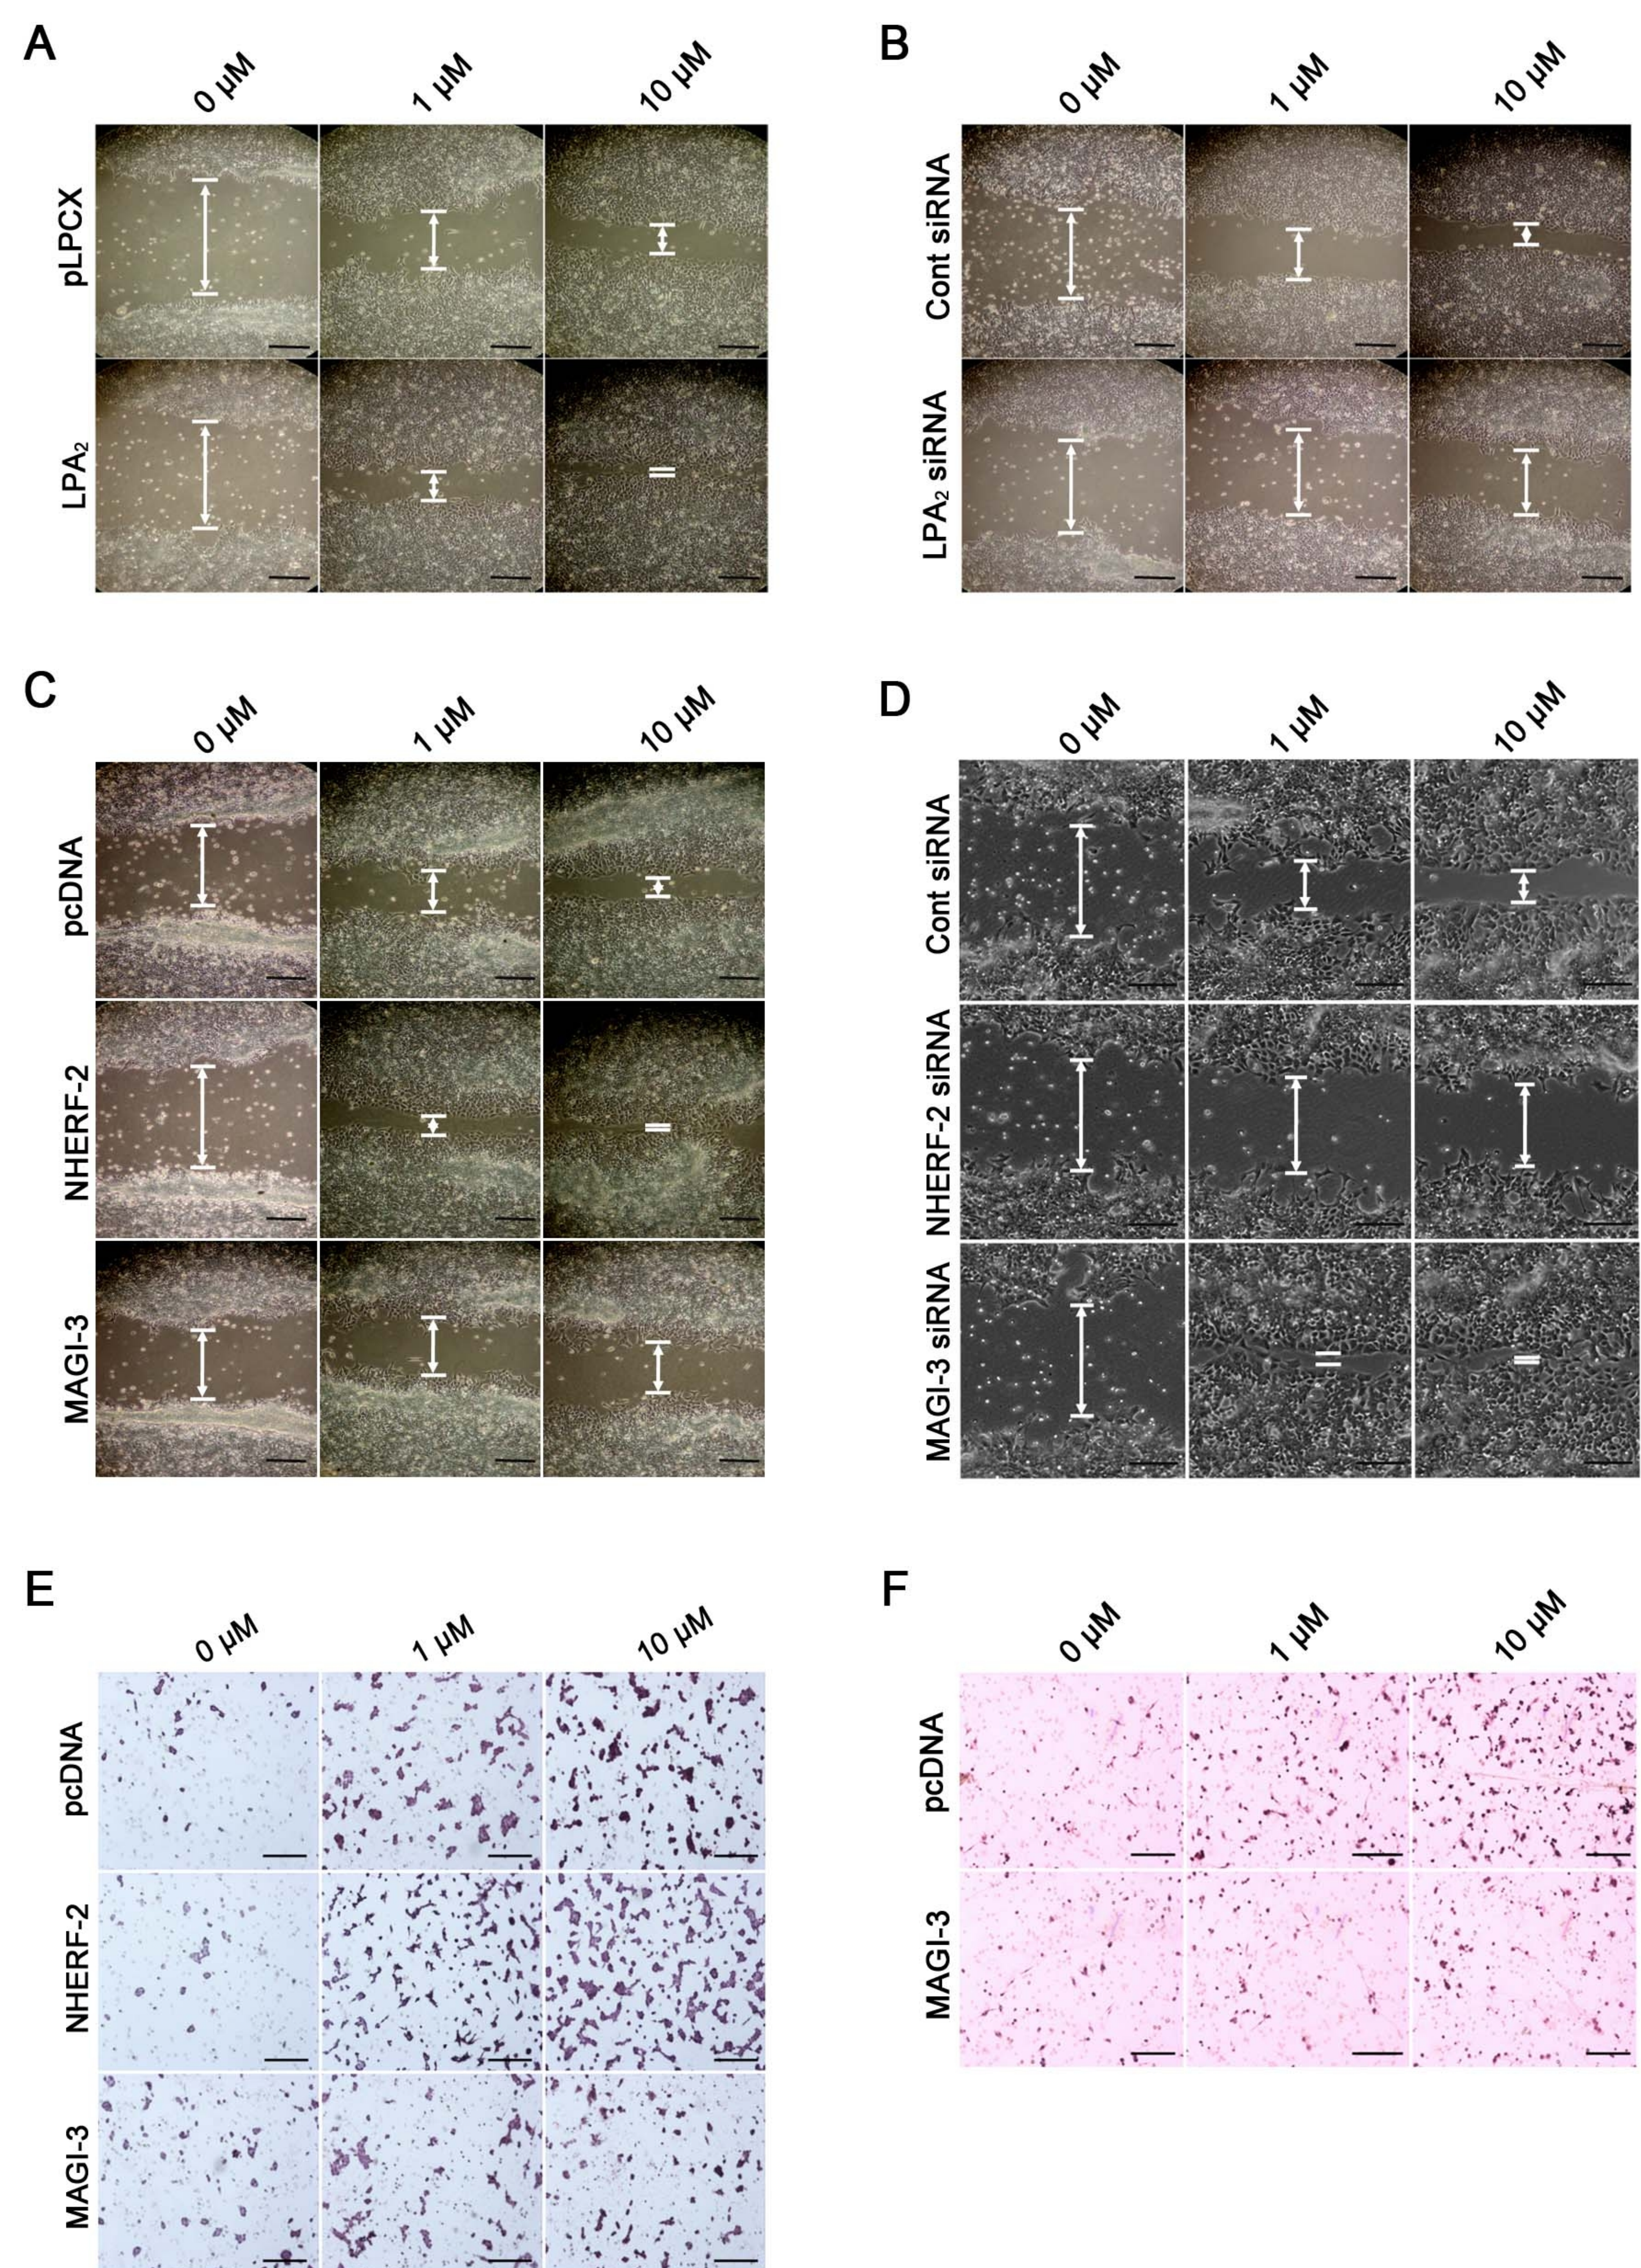

Supplementary Figure S1



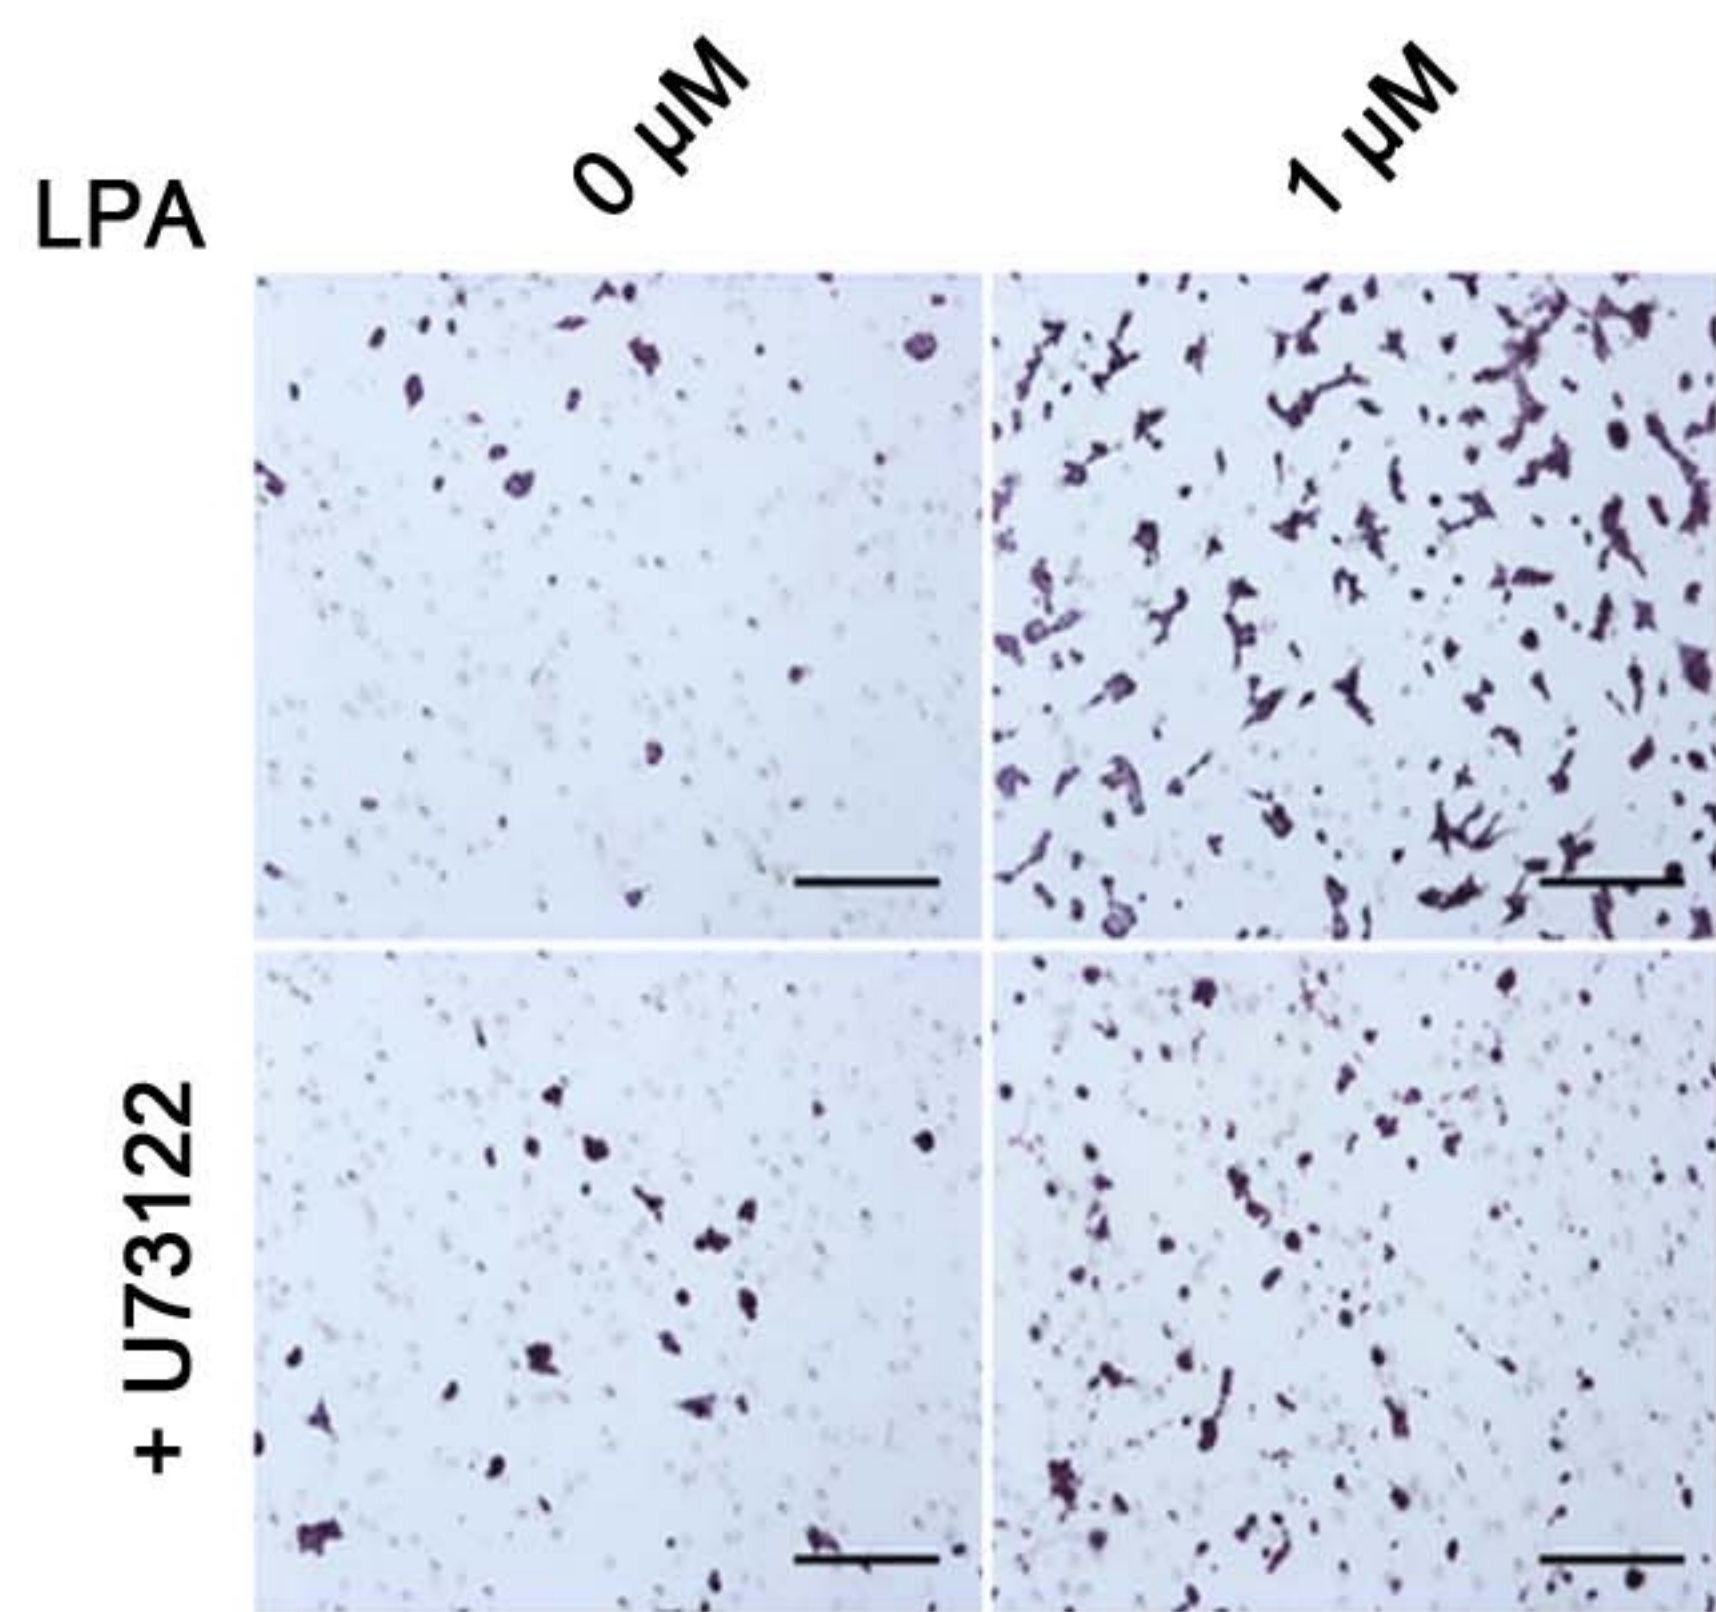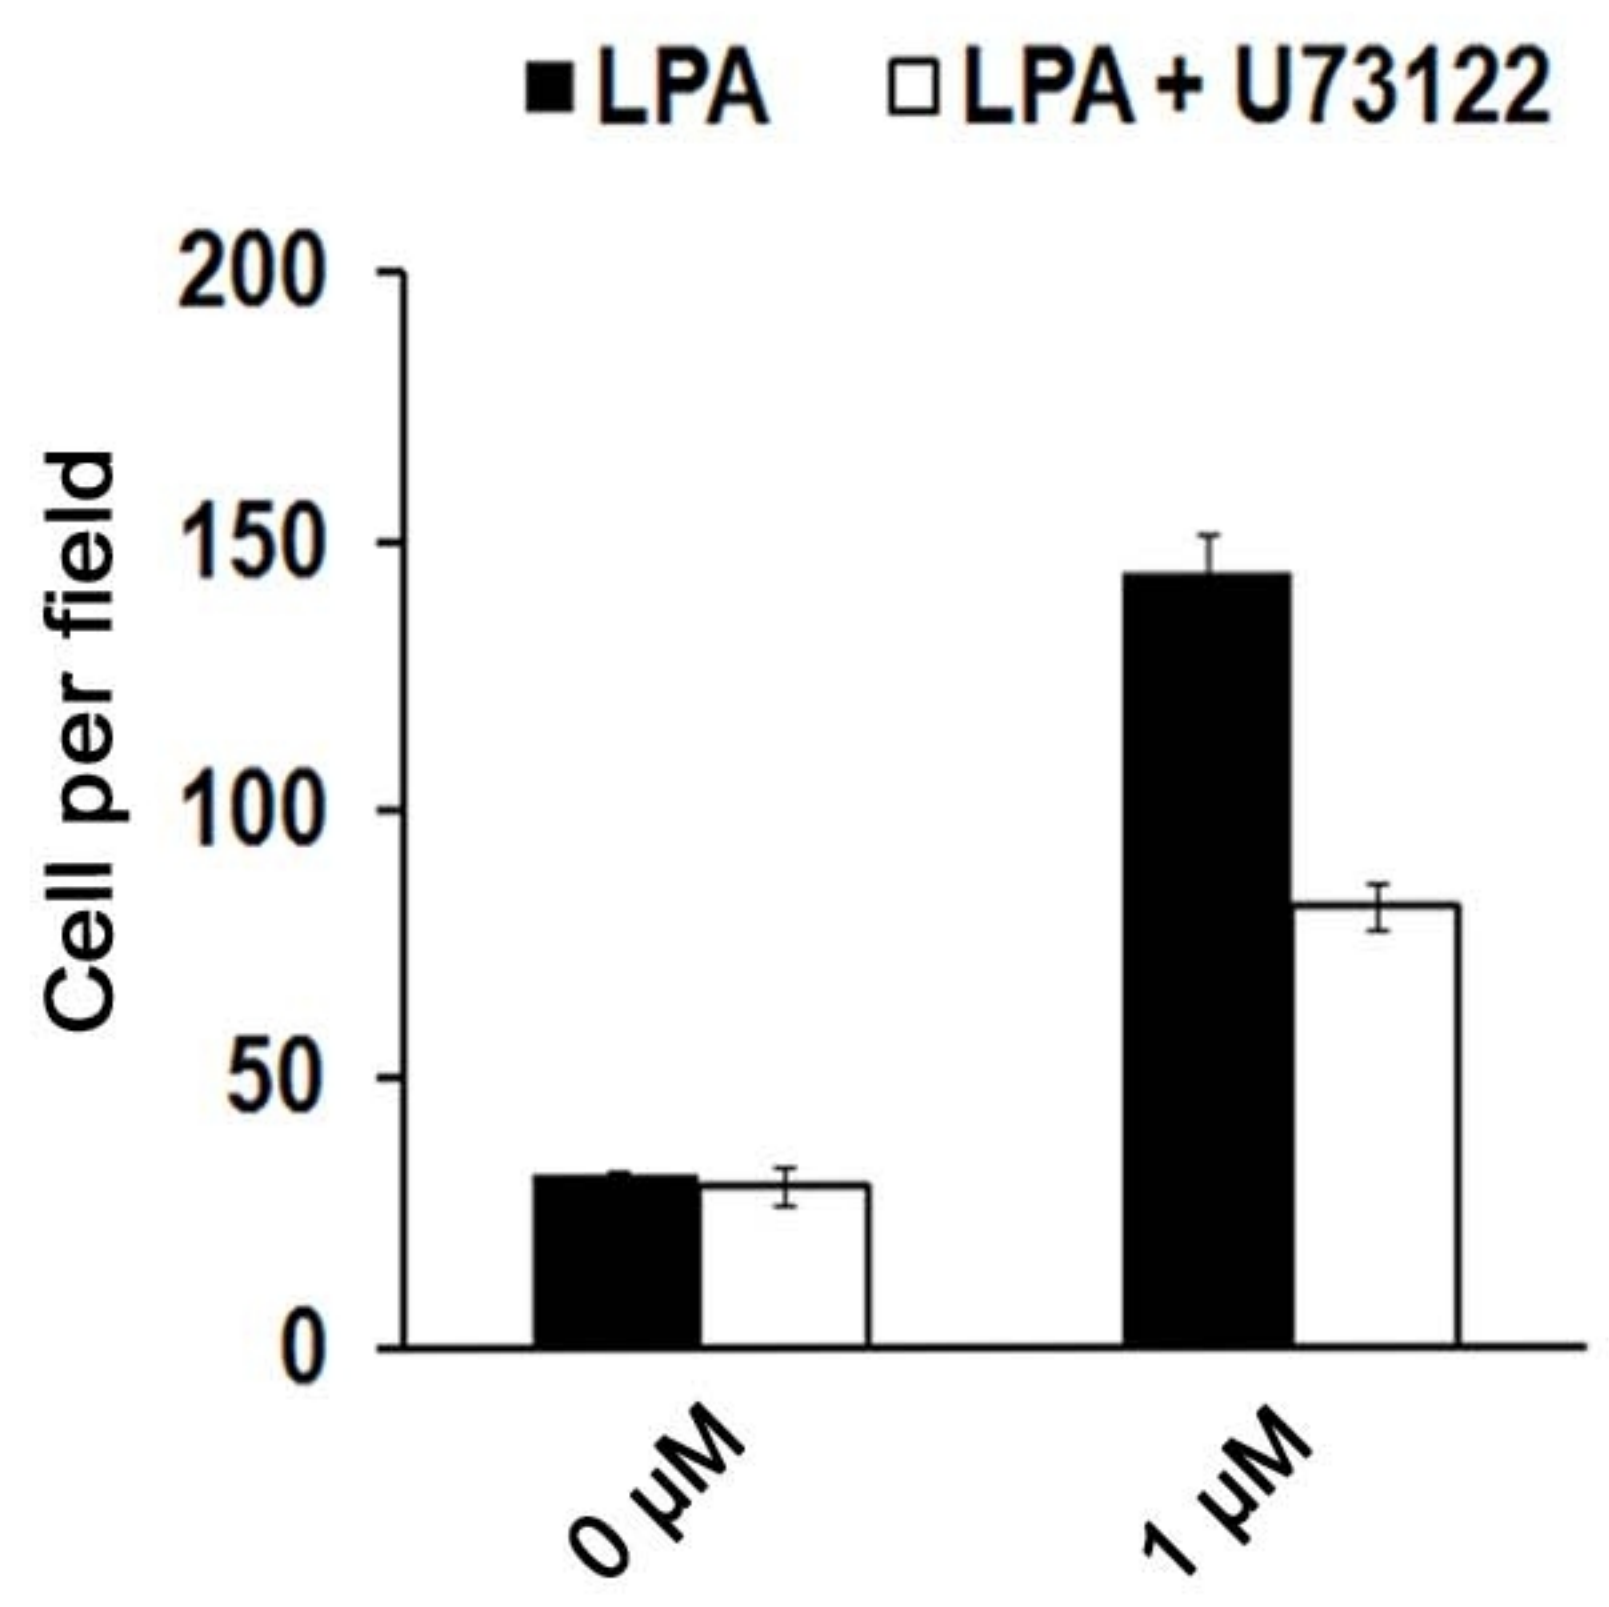

Supplementary Figure S2

**A**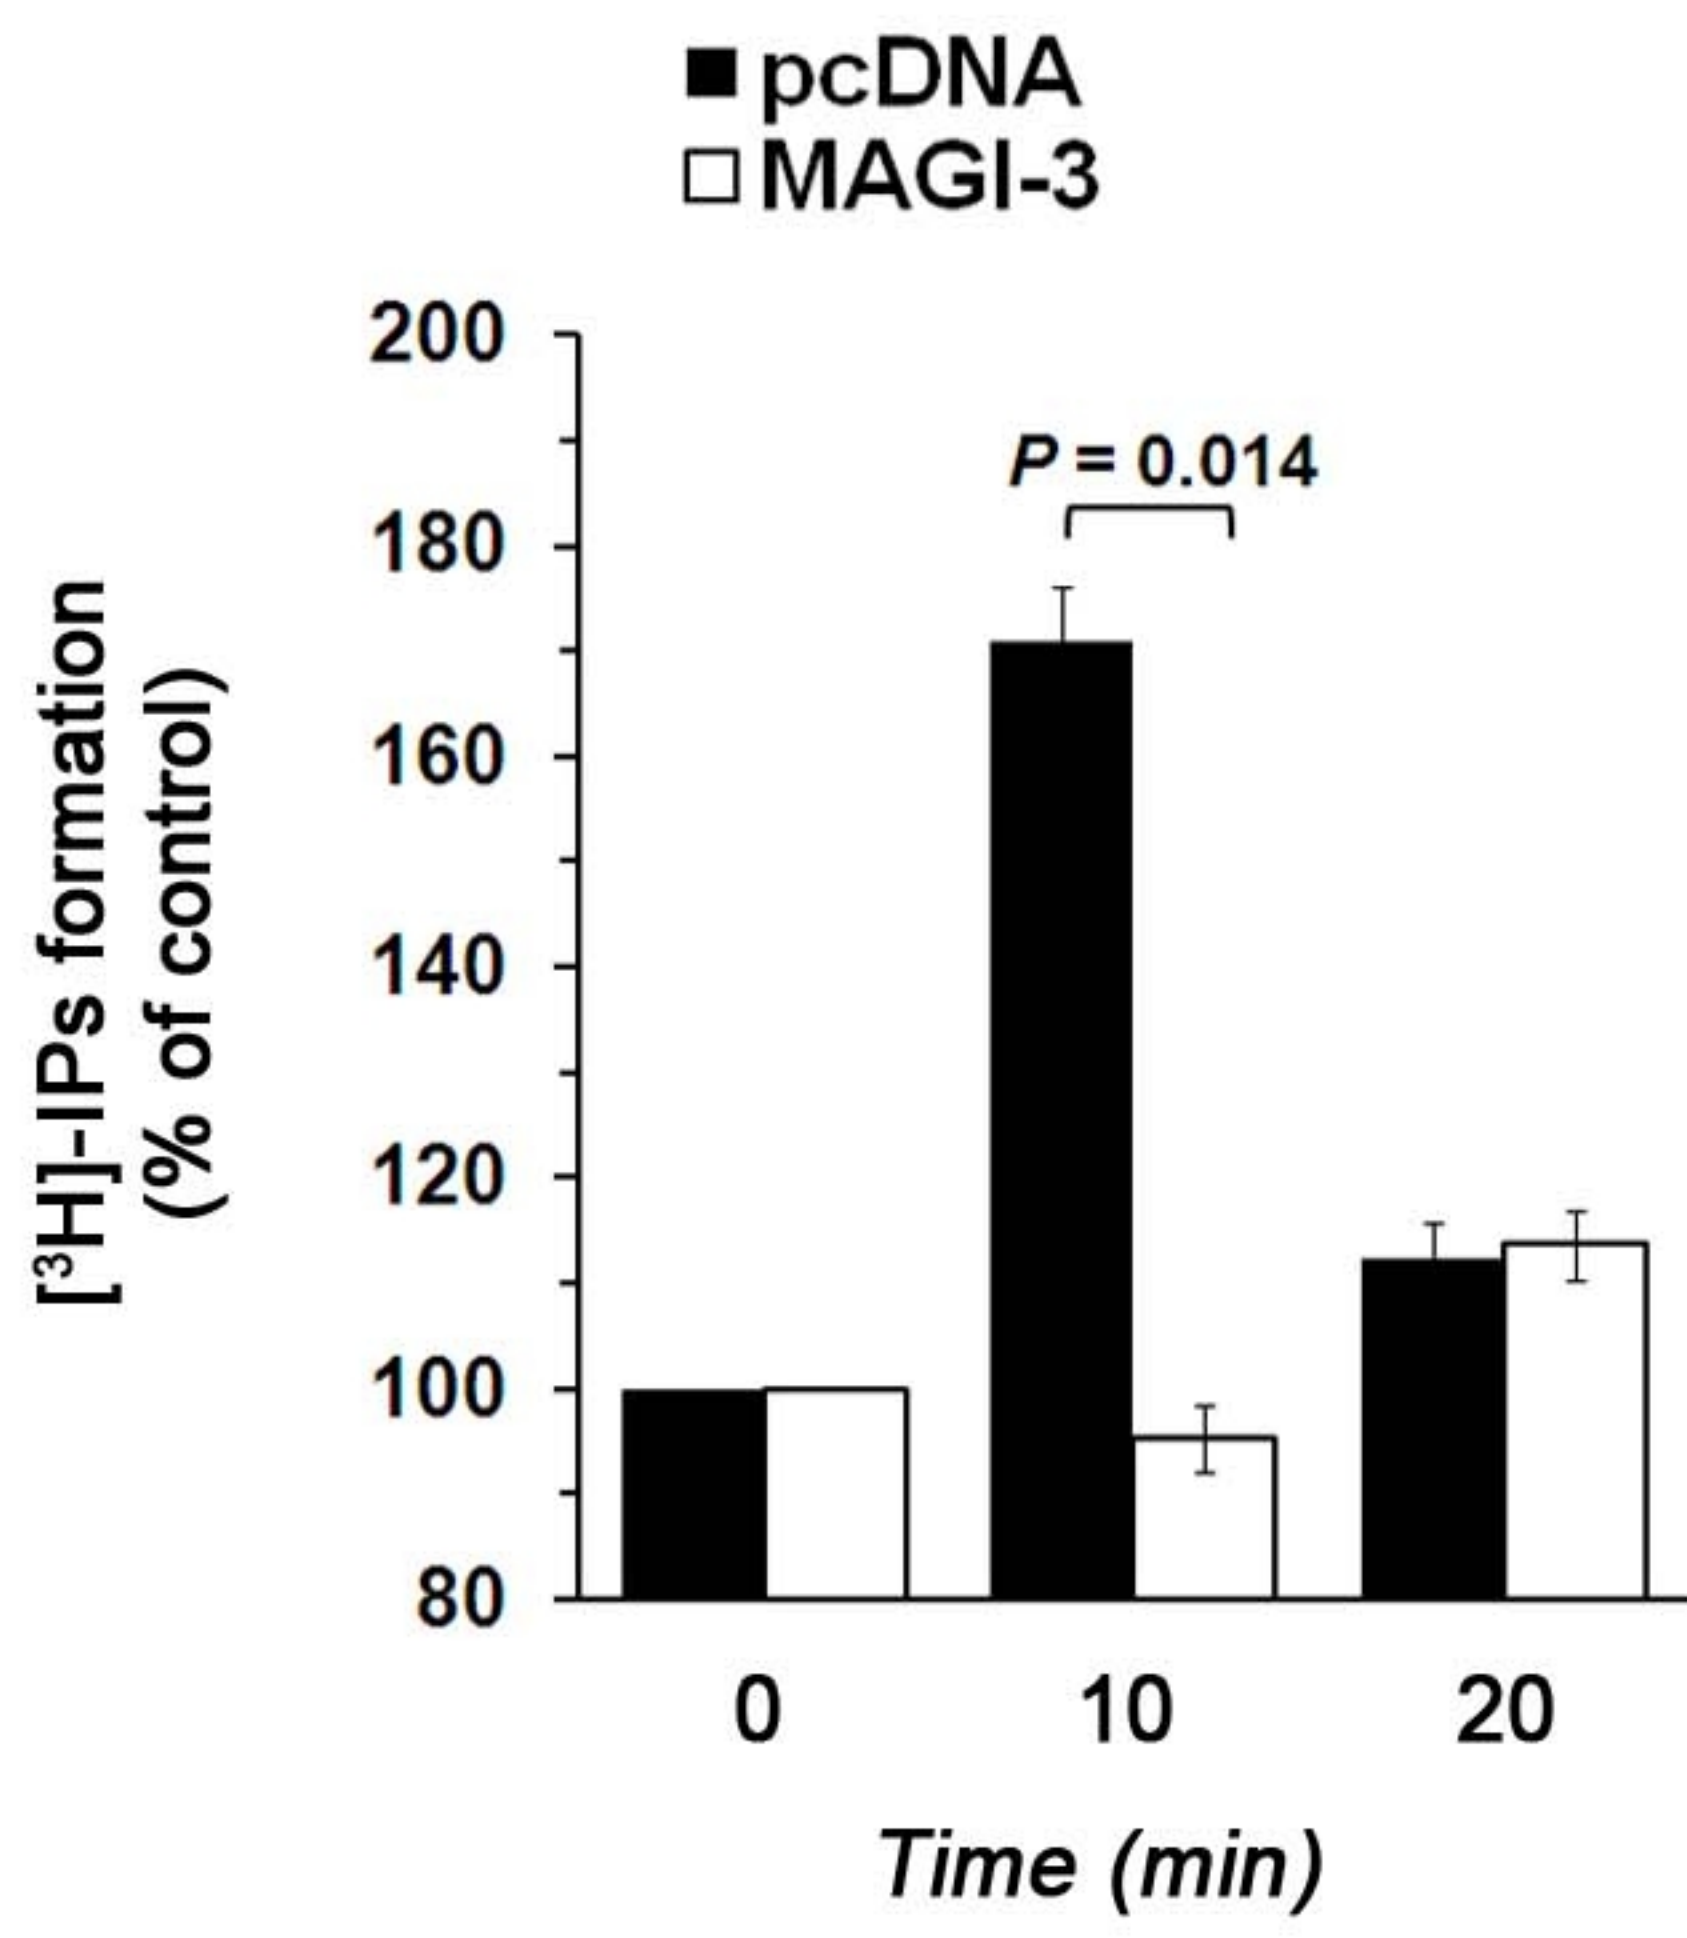**B**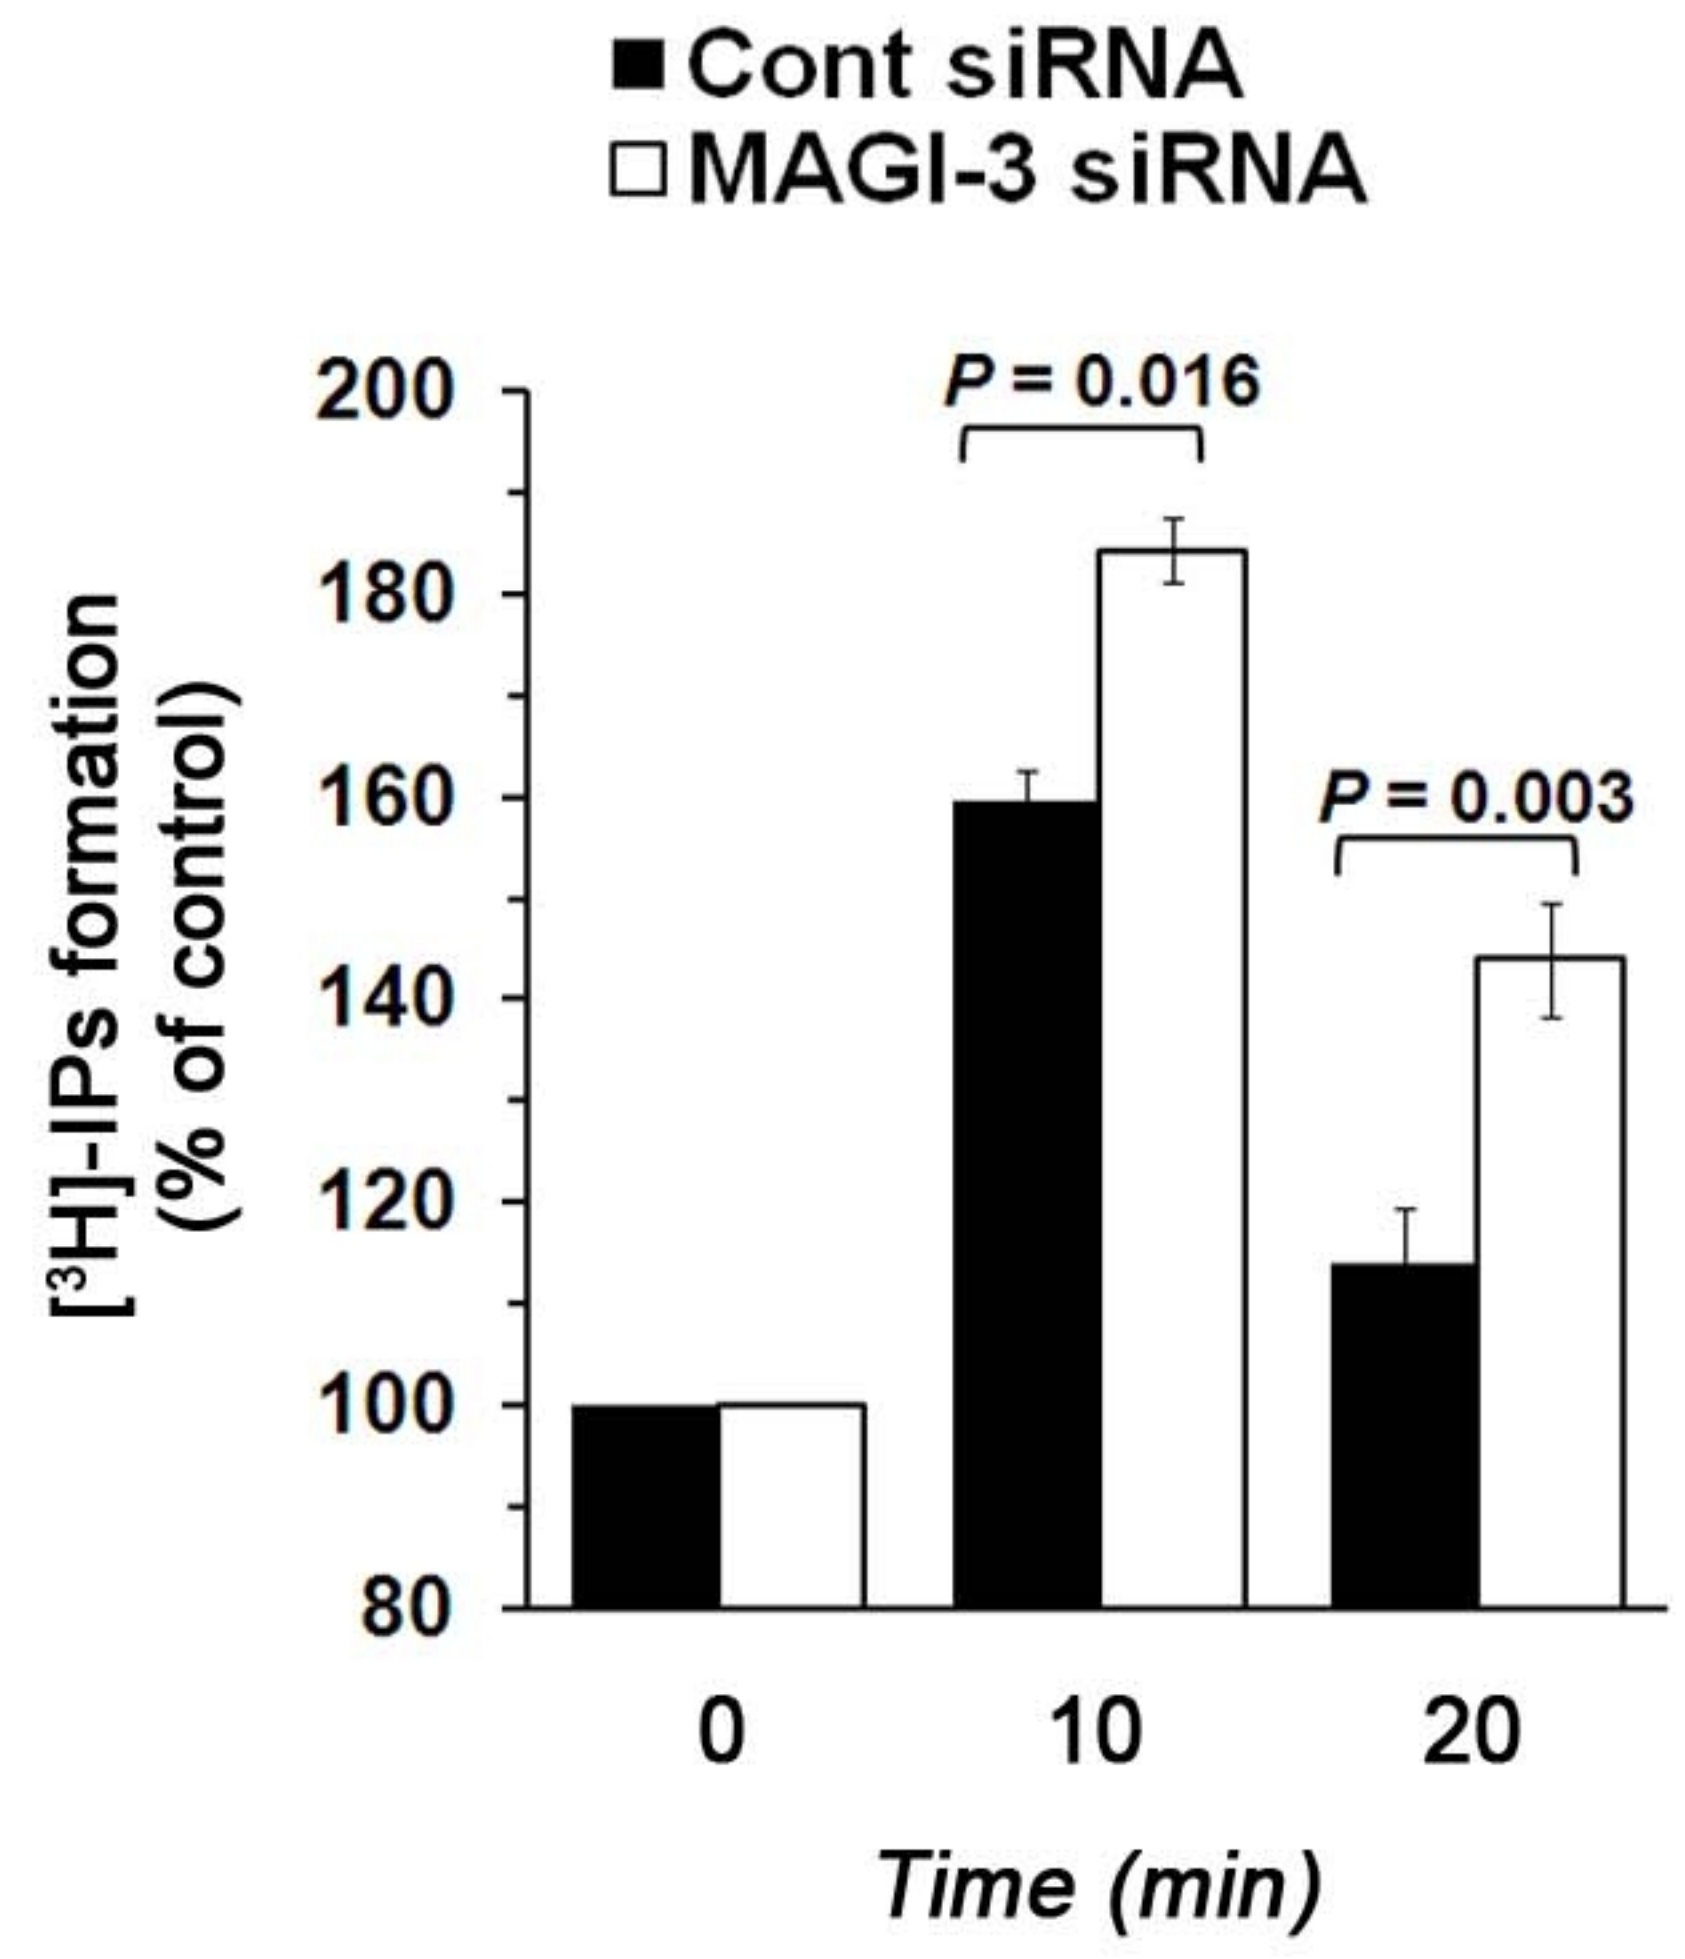



**A**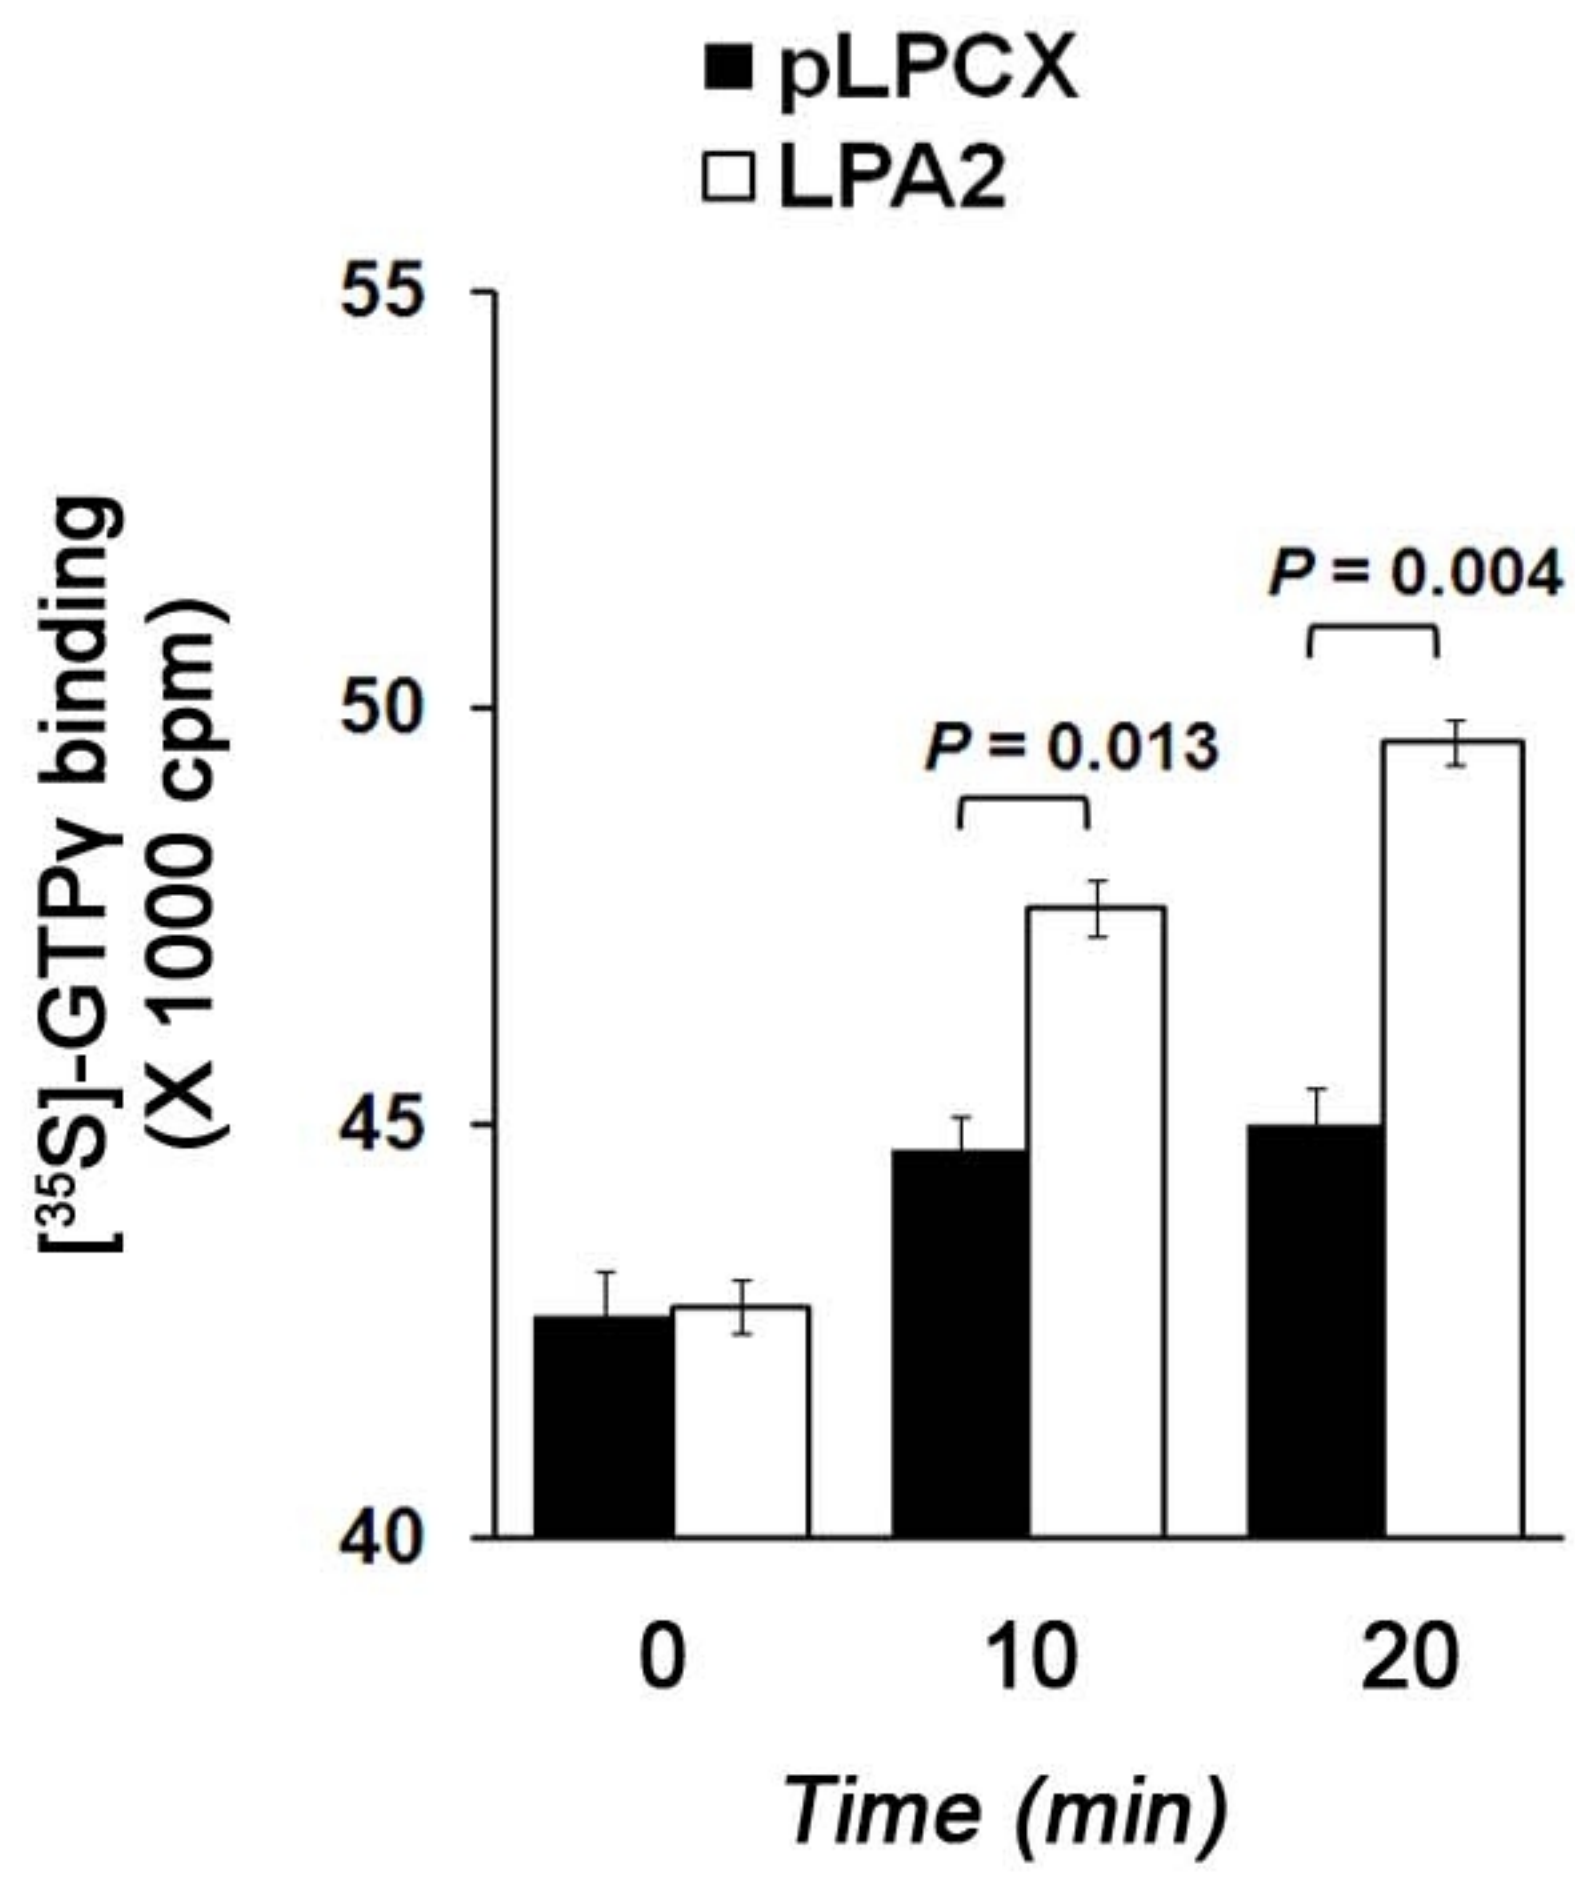**B**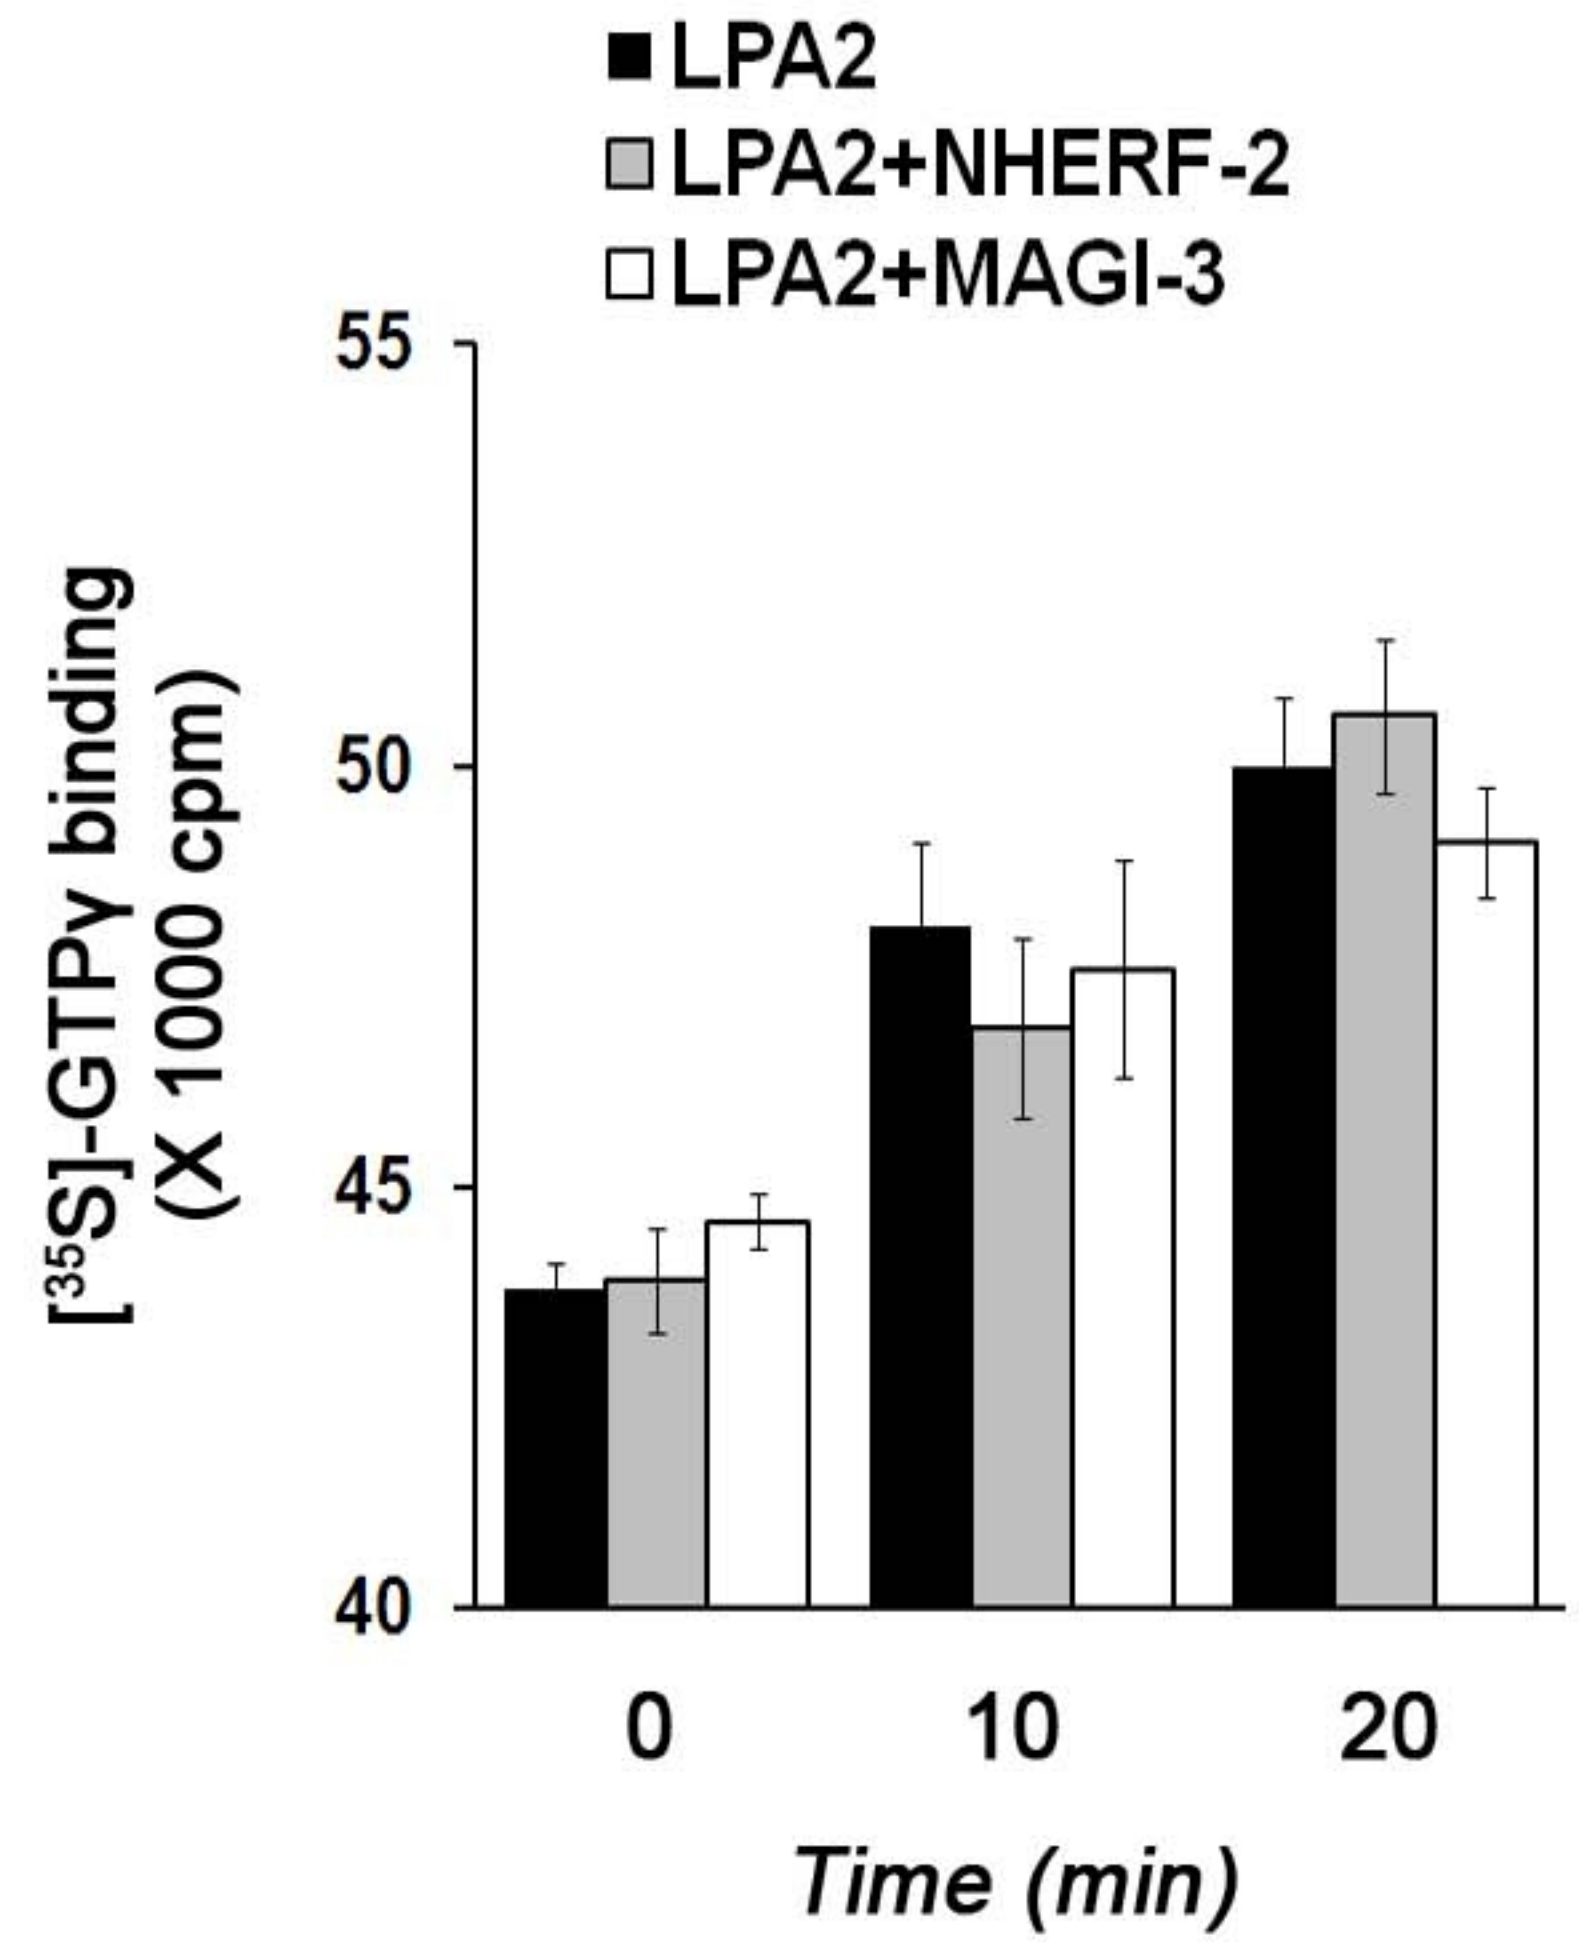



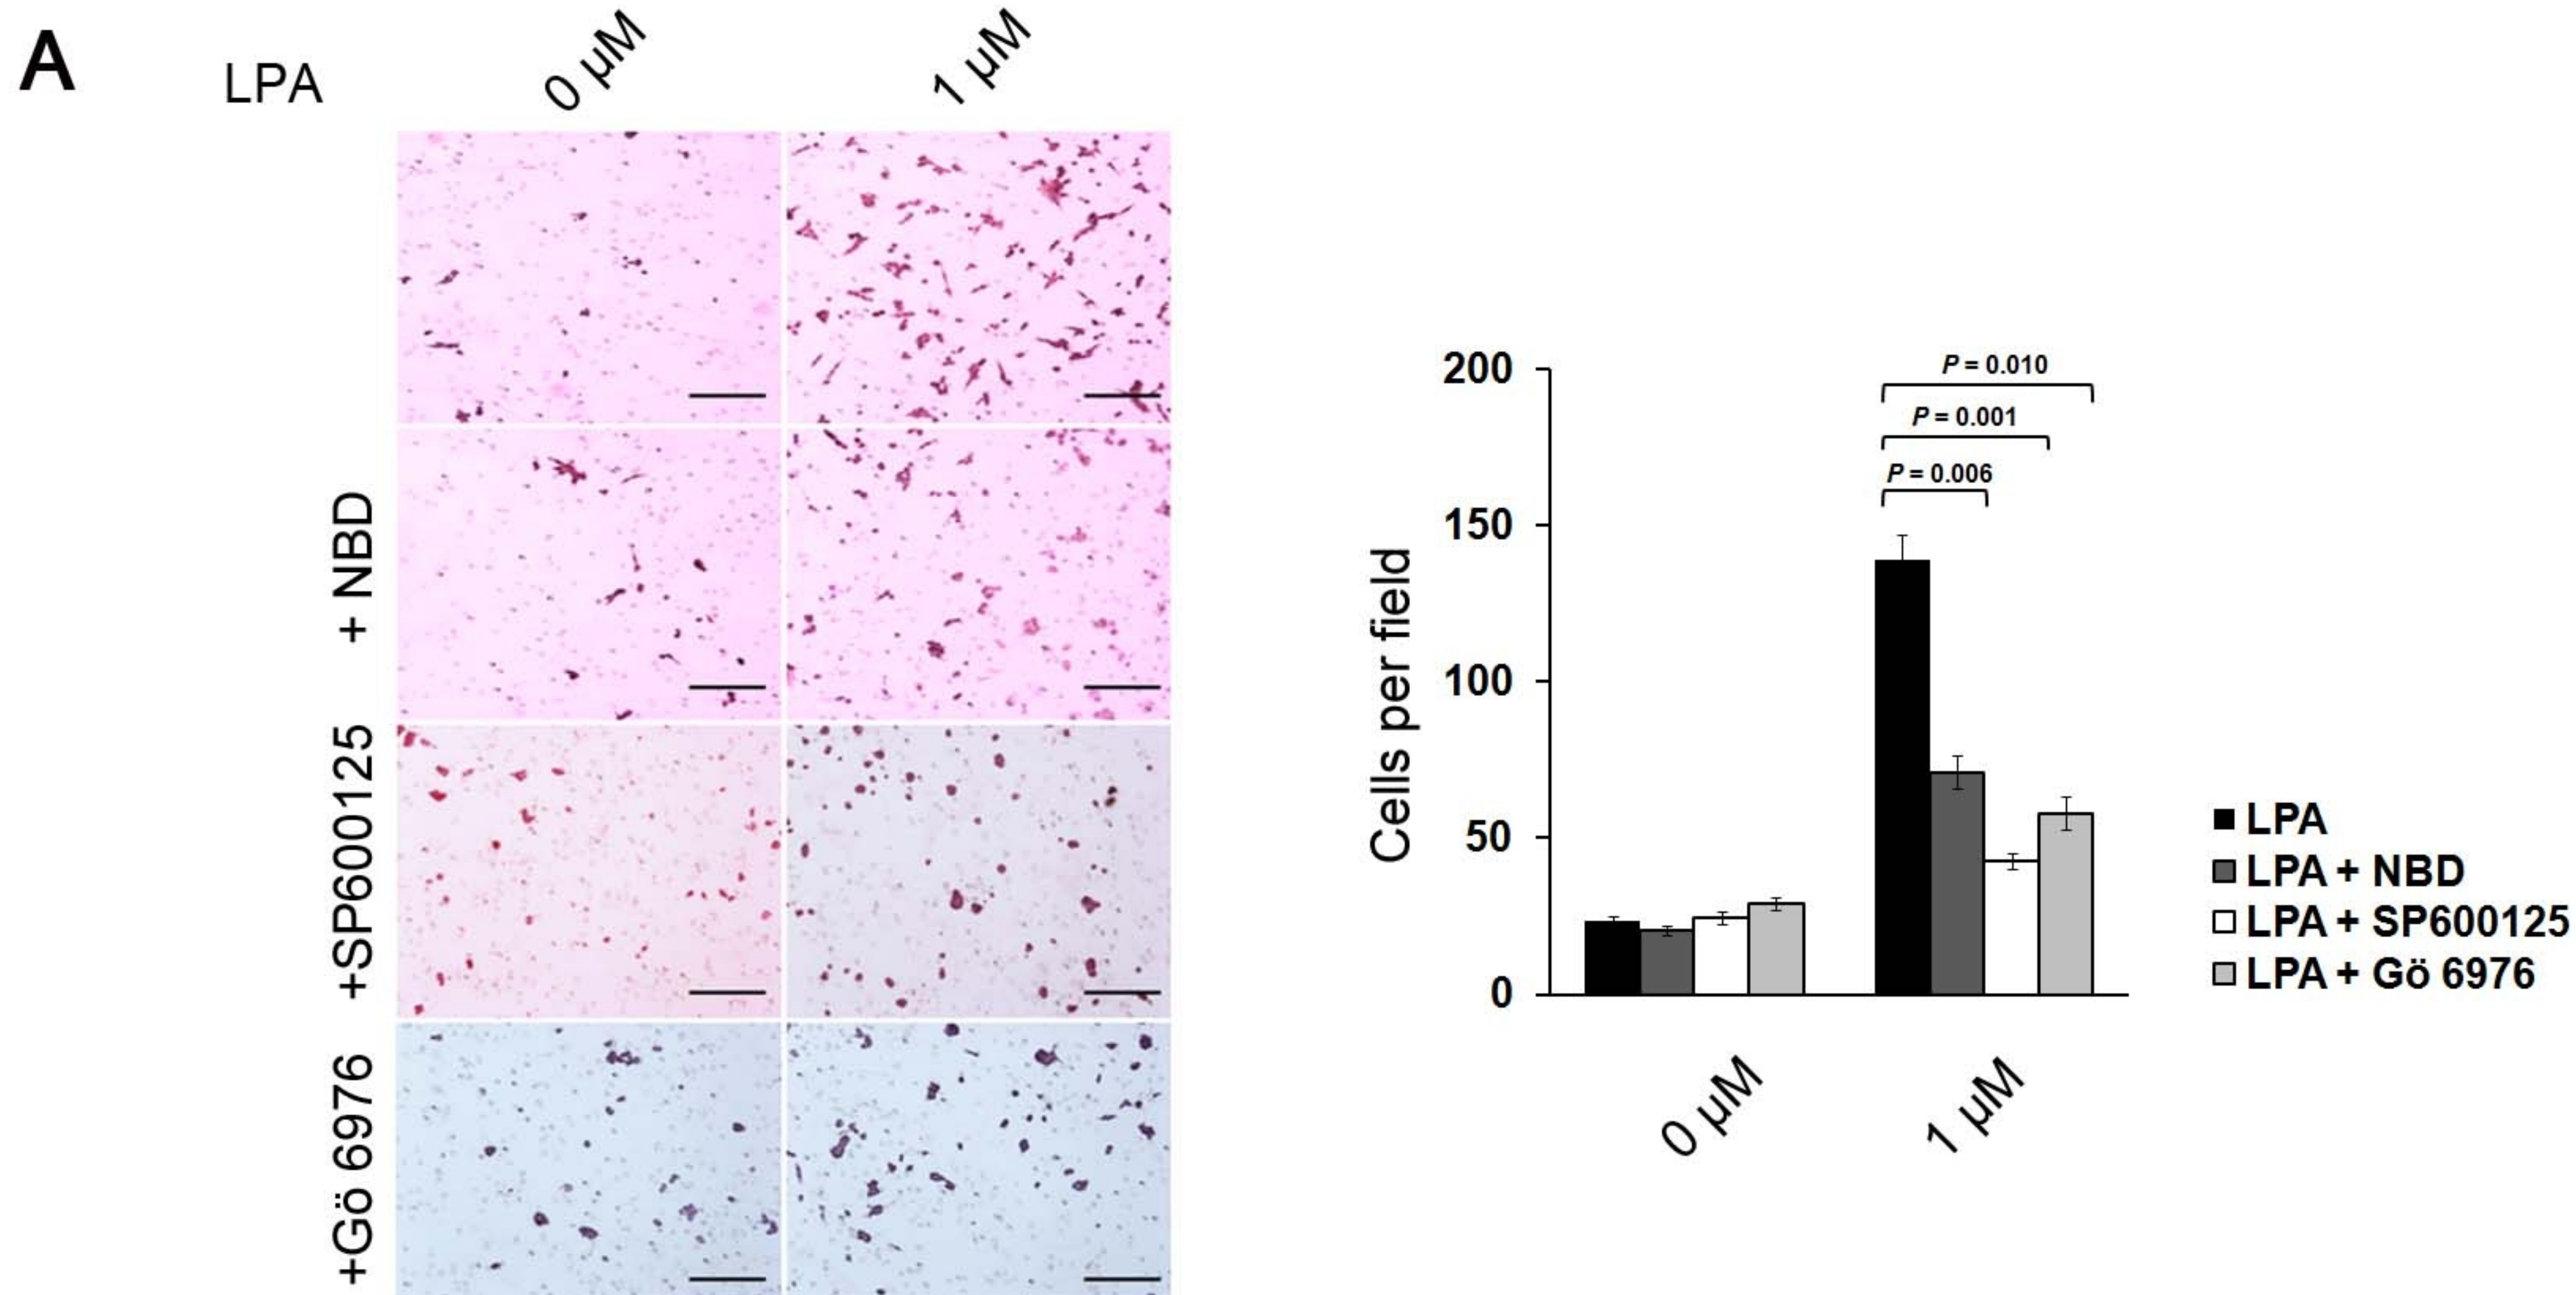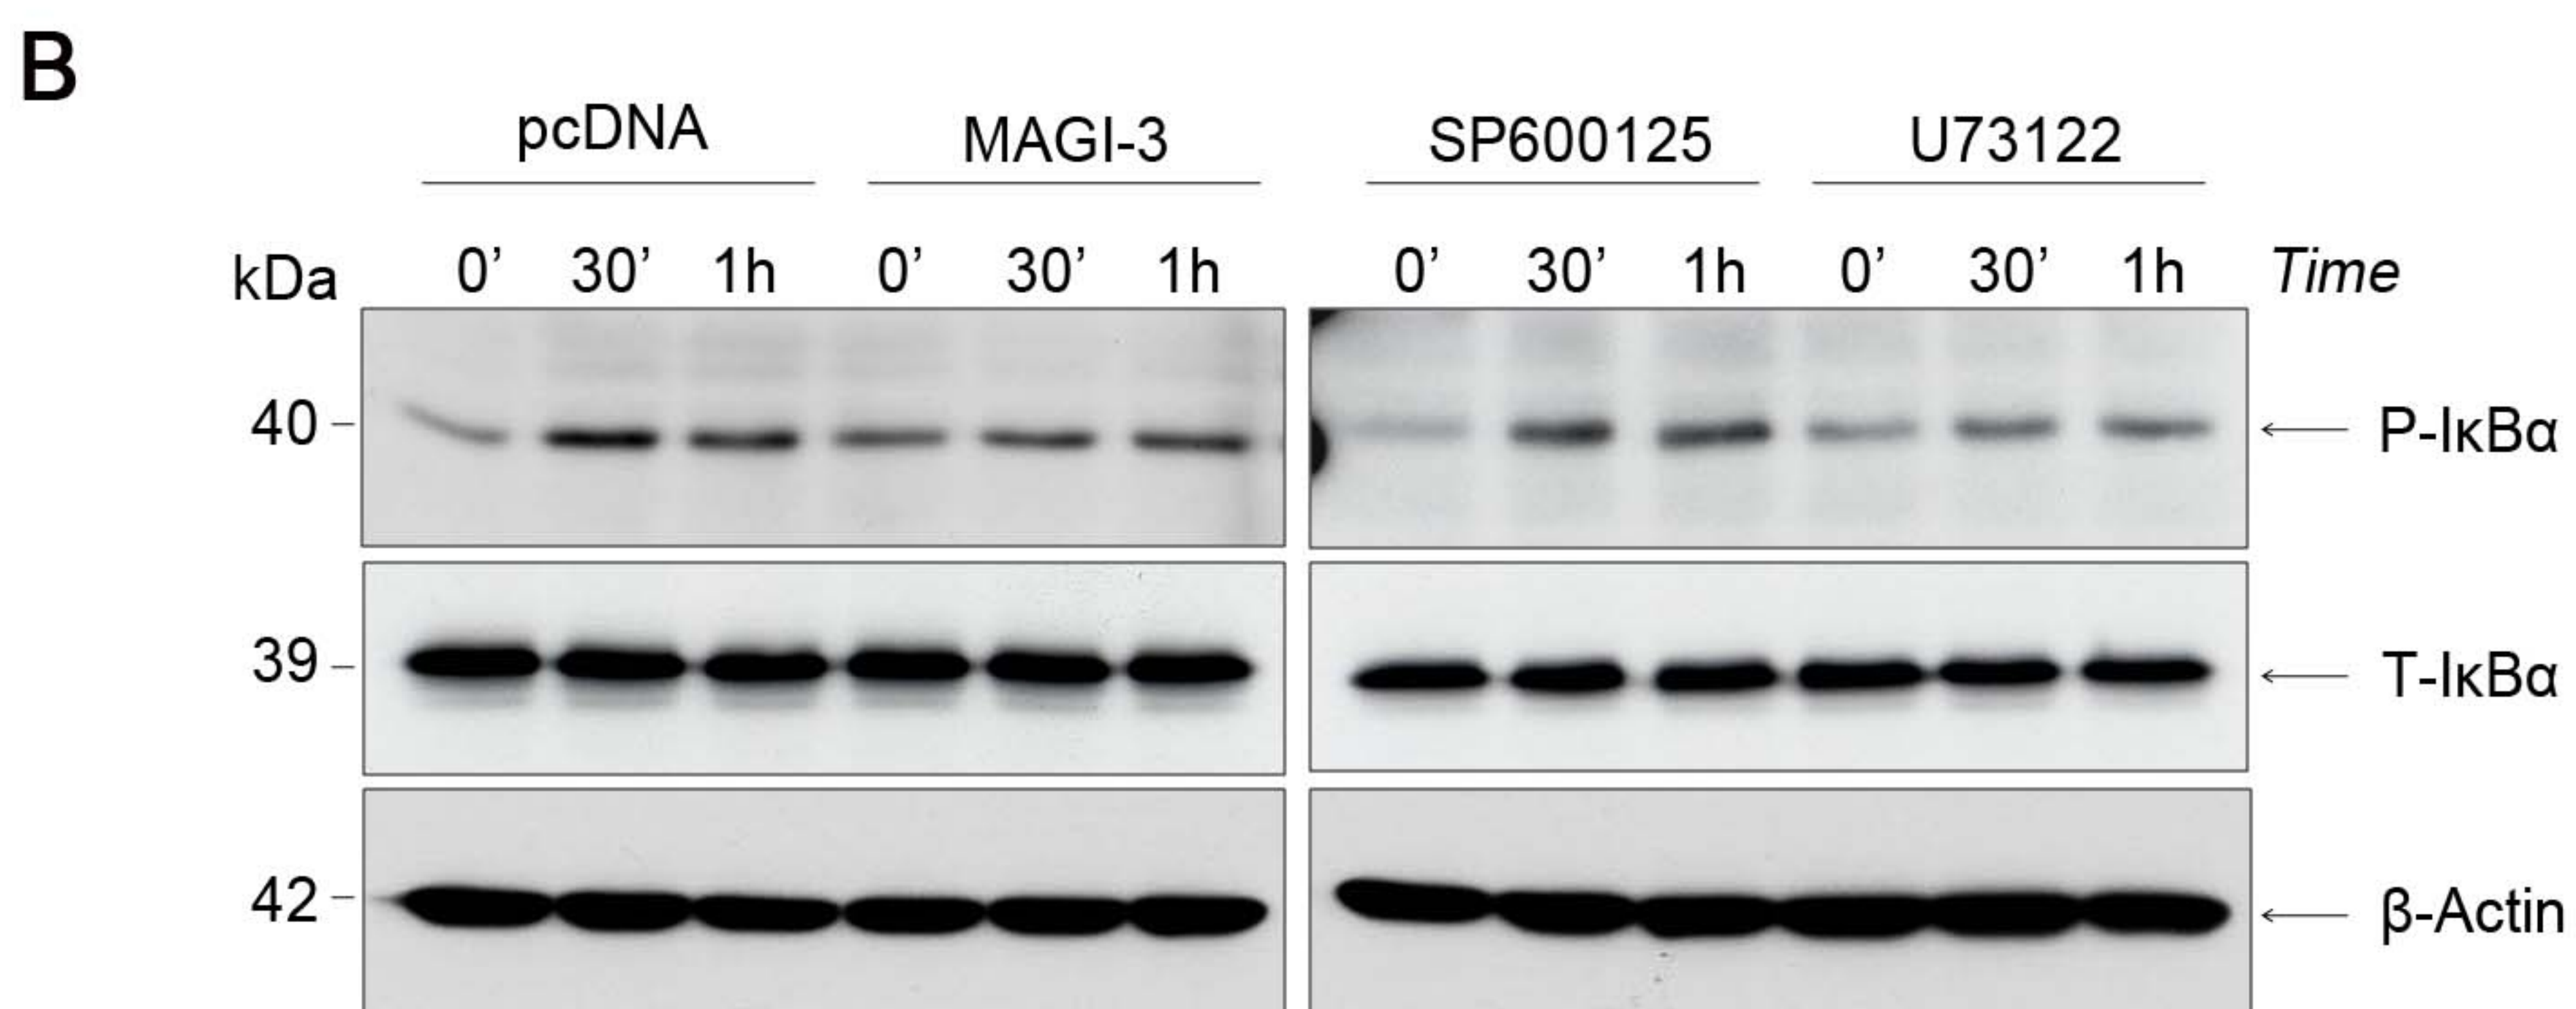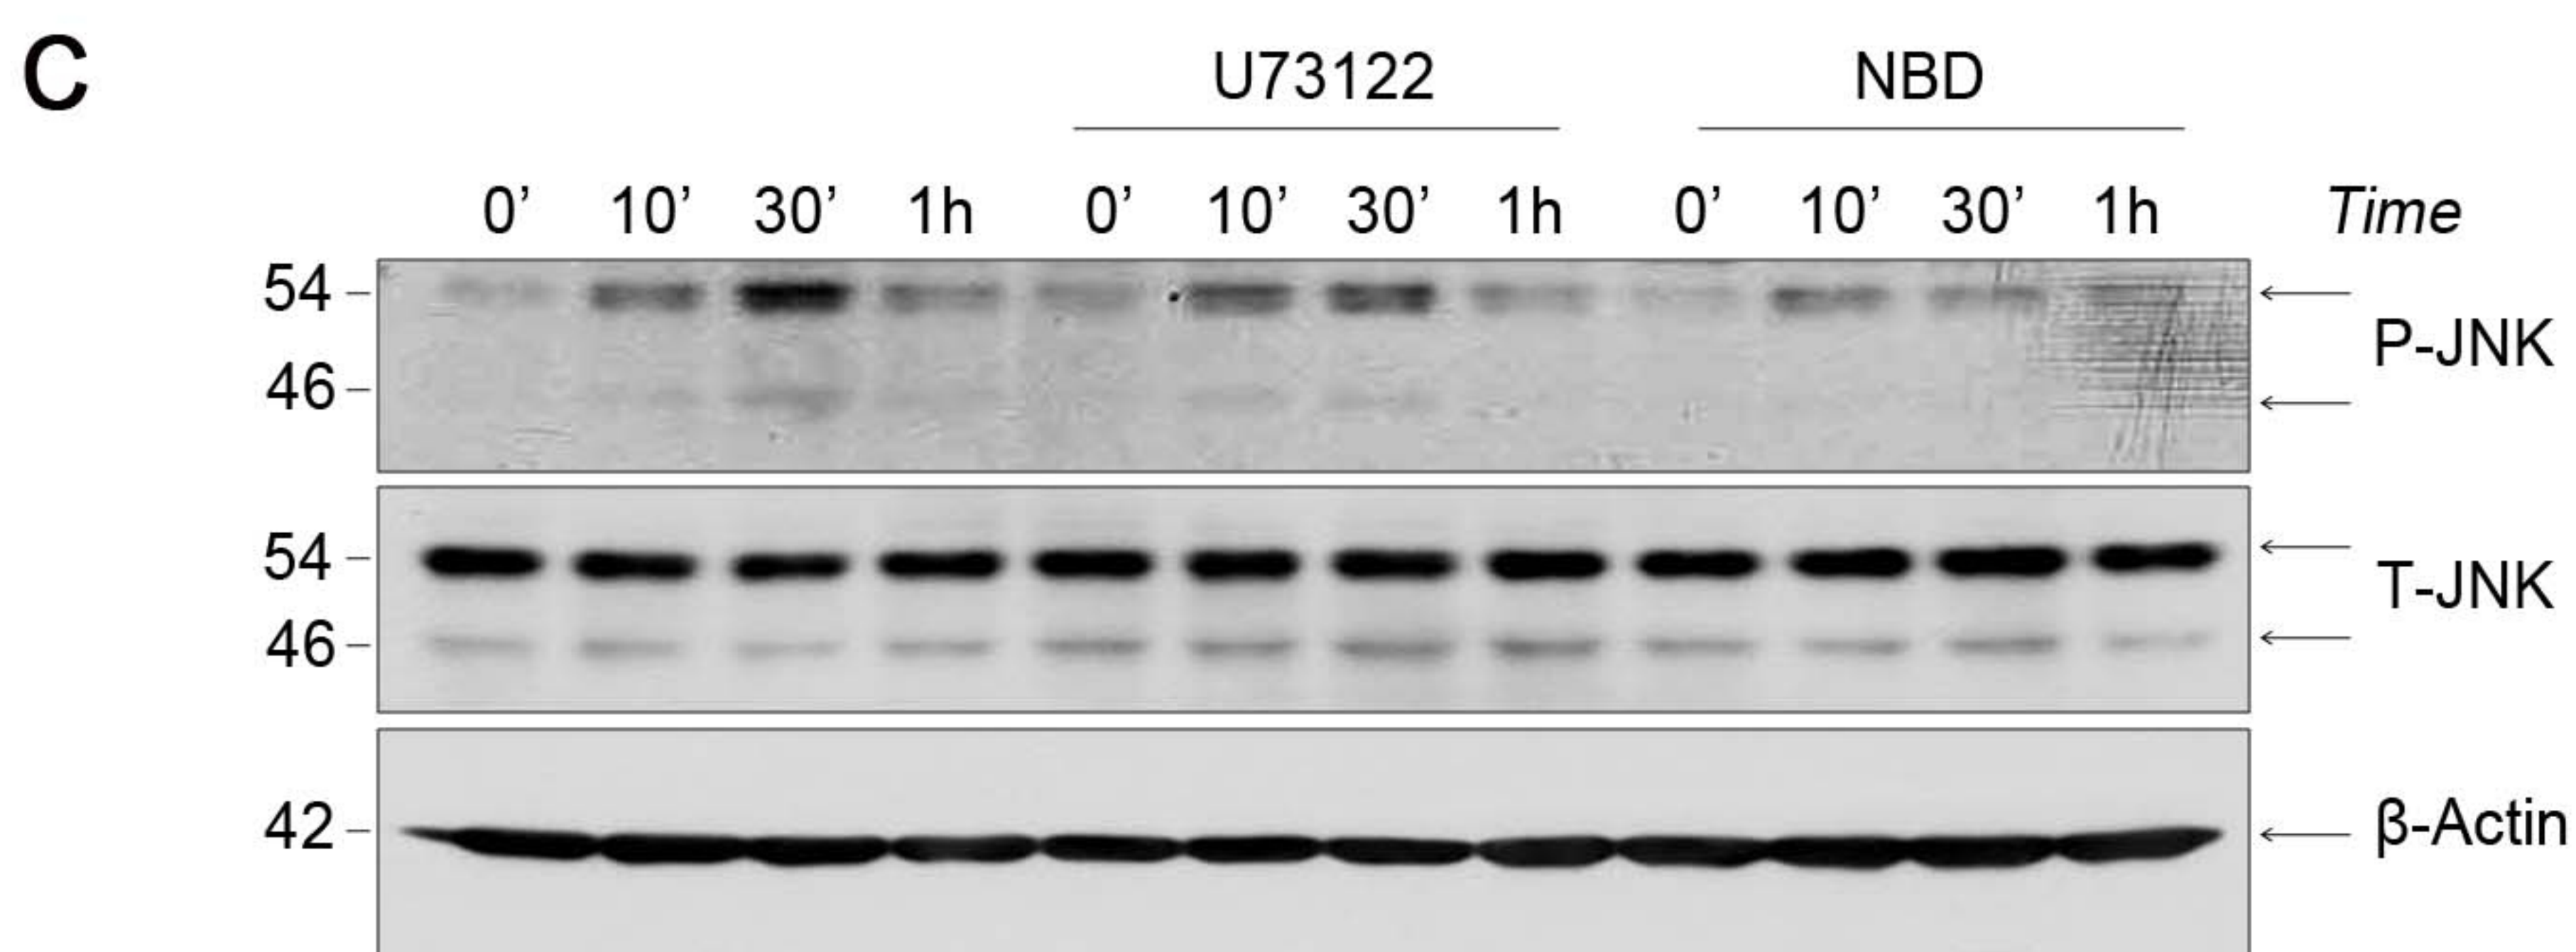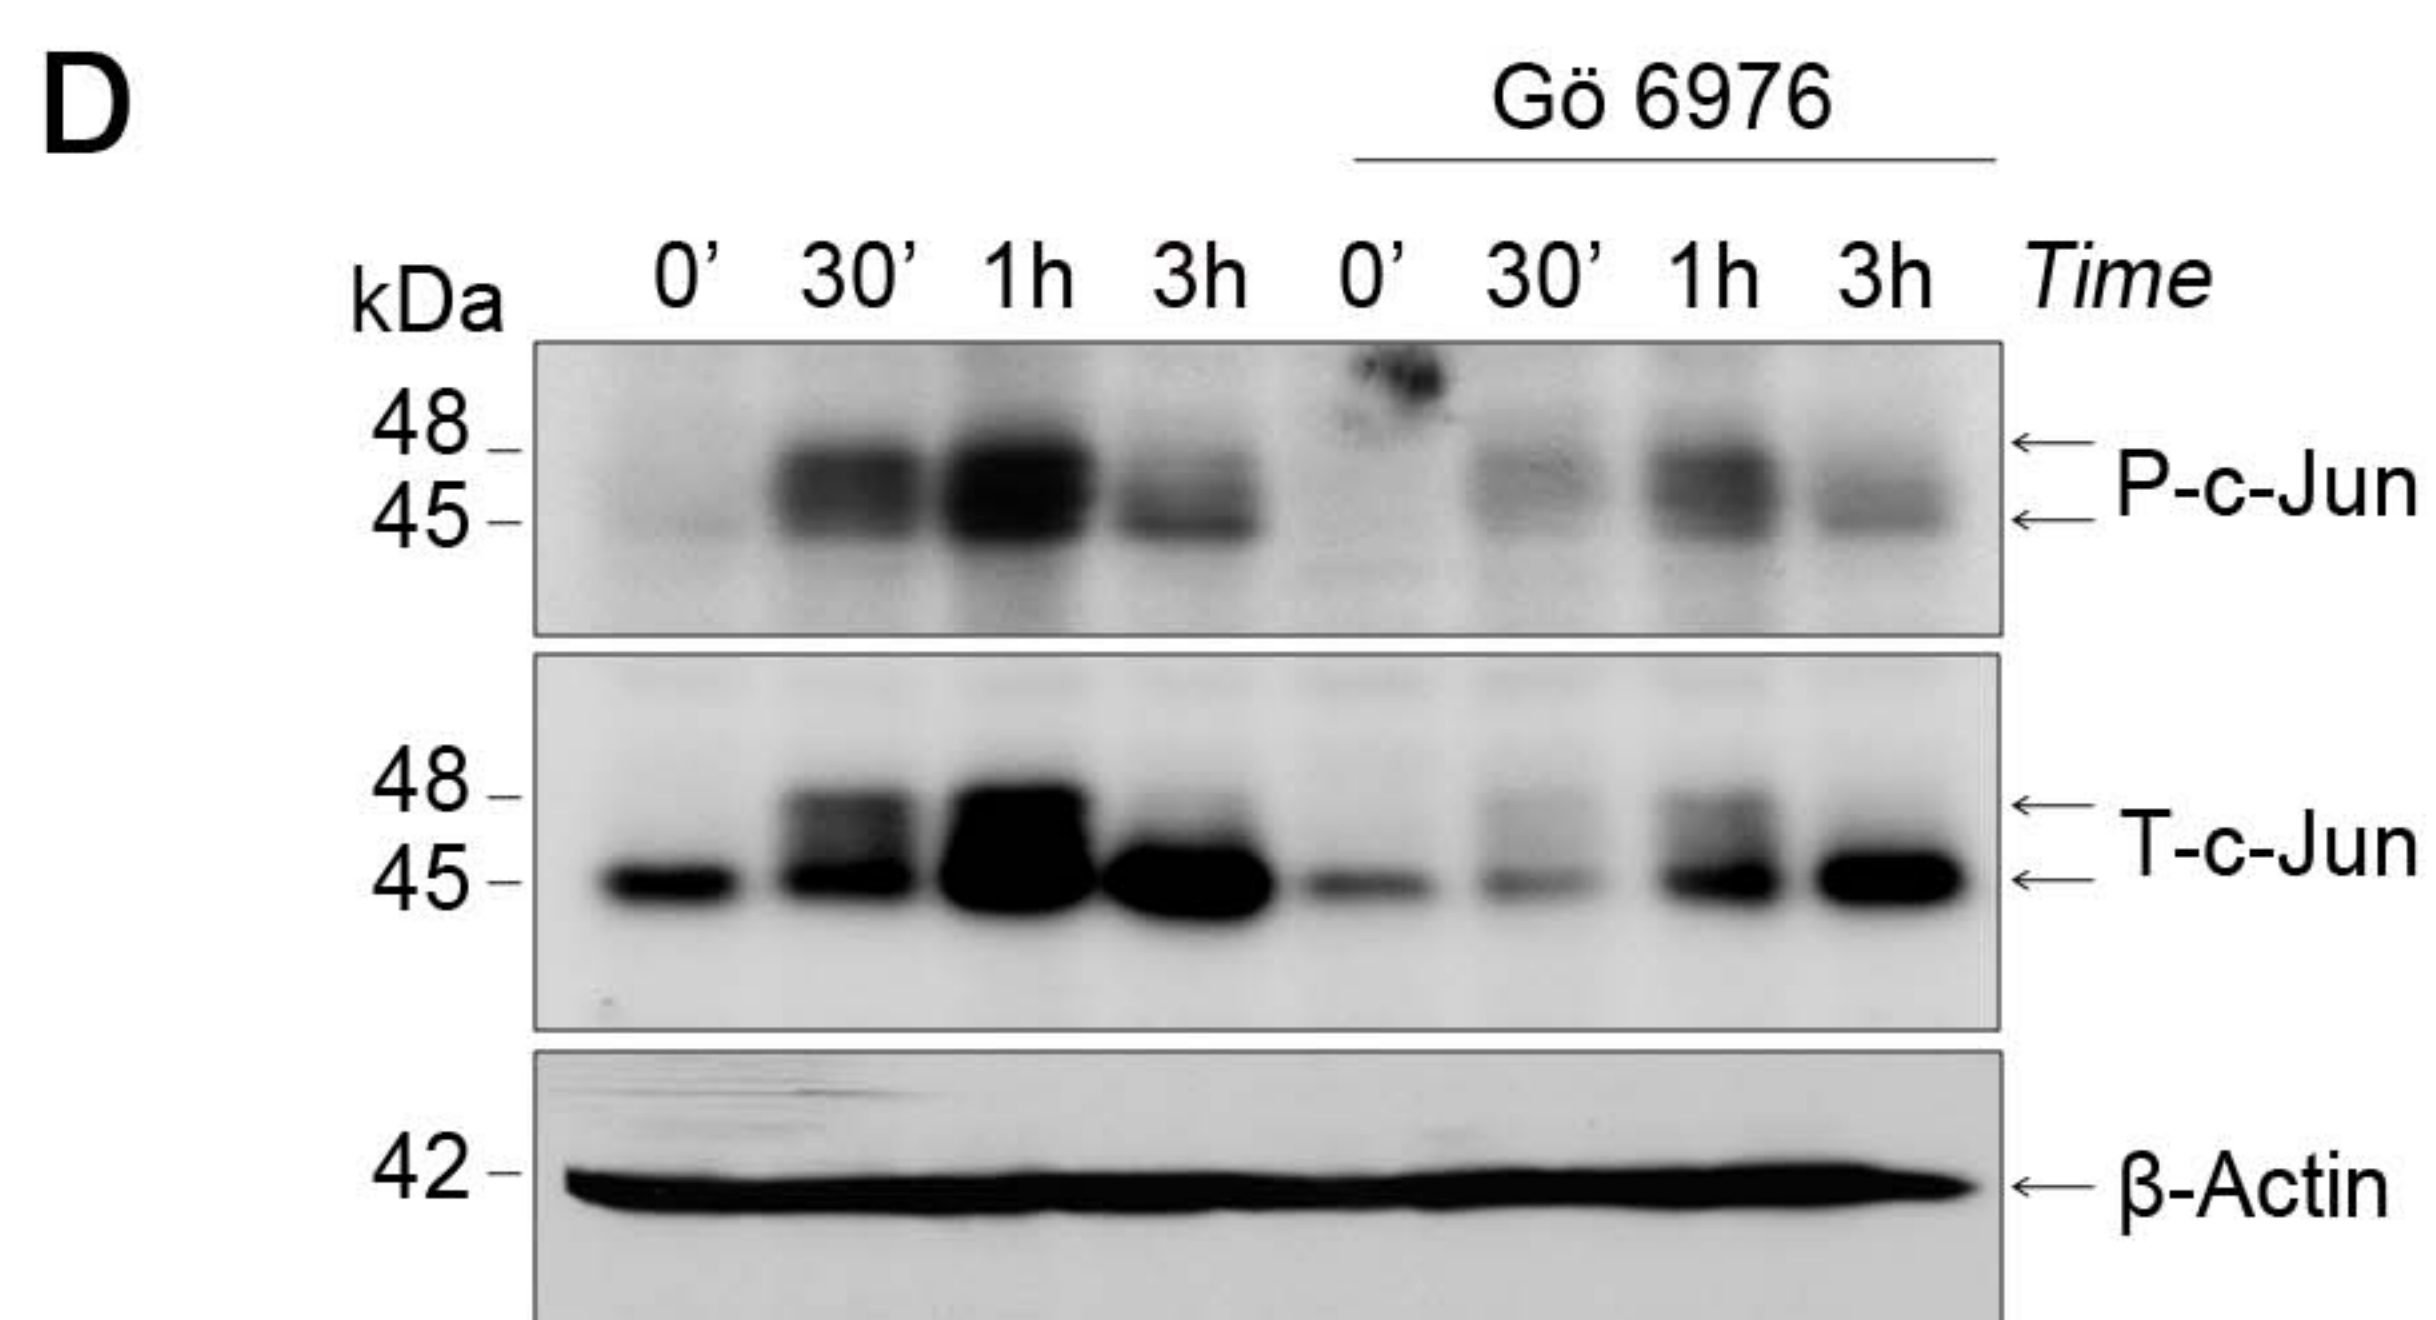

Supplementary Figure S5



**A**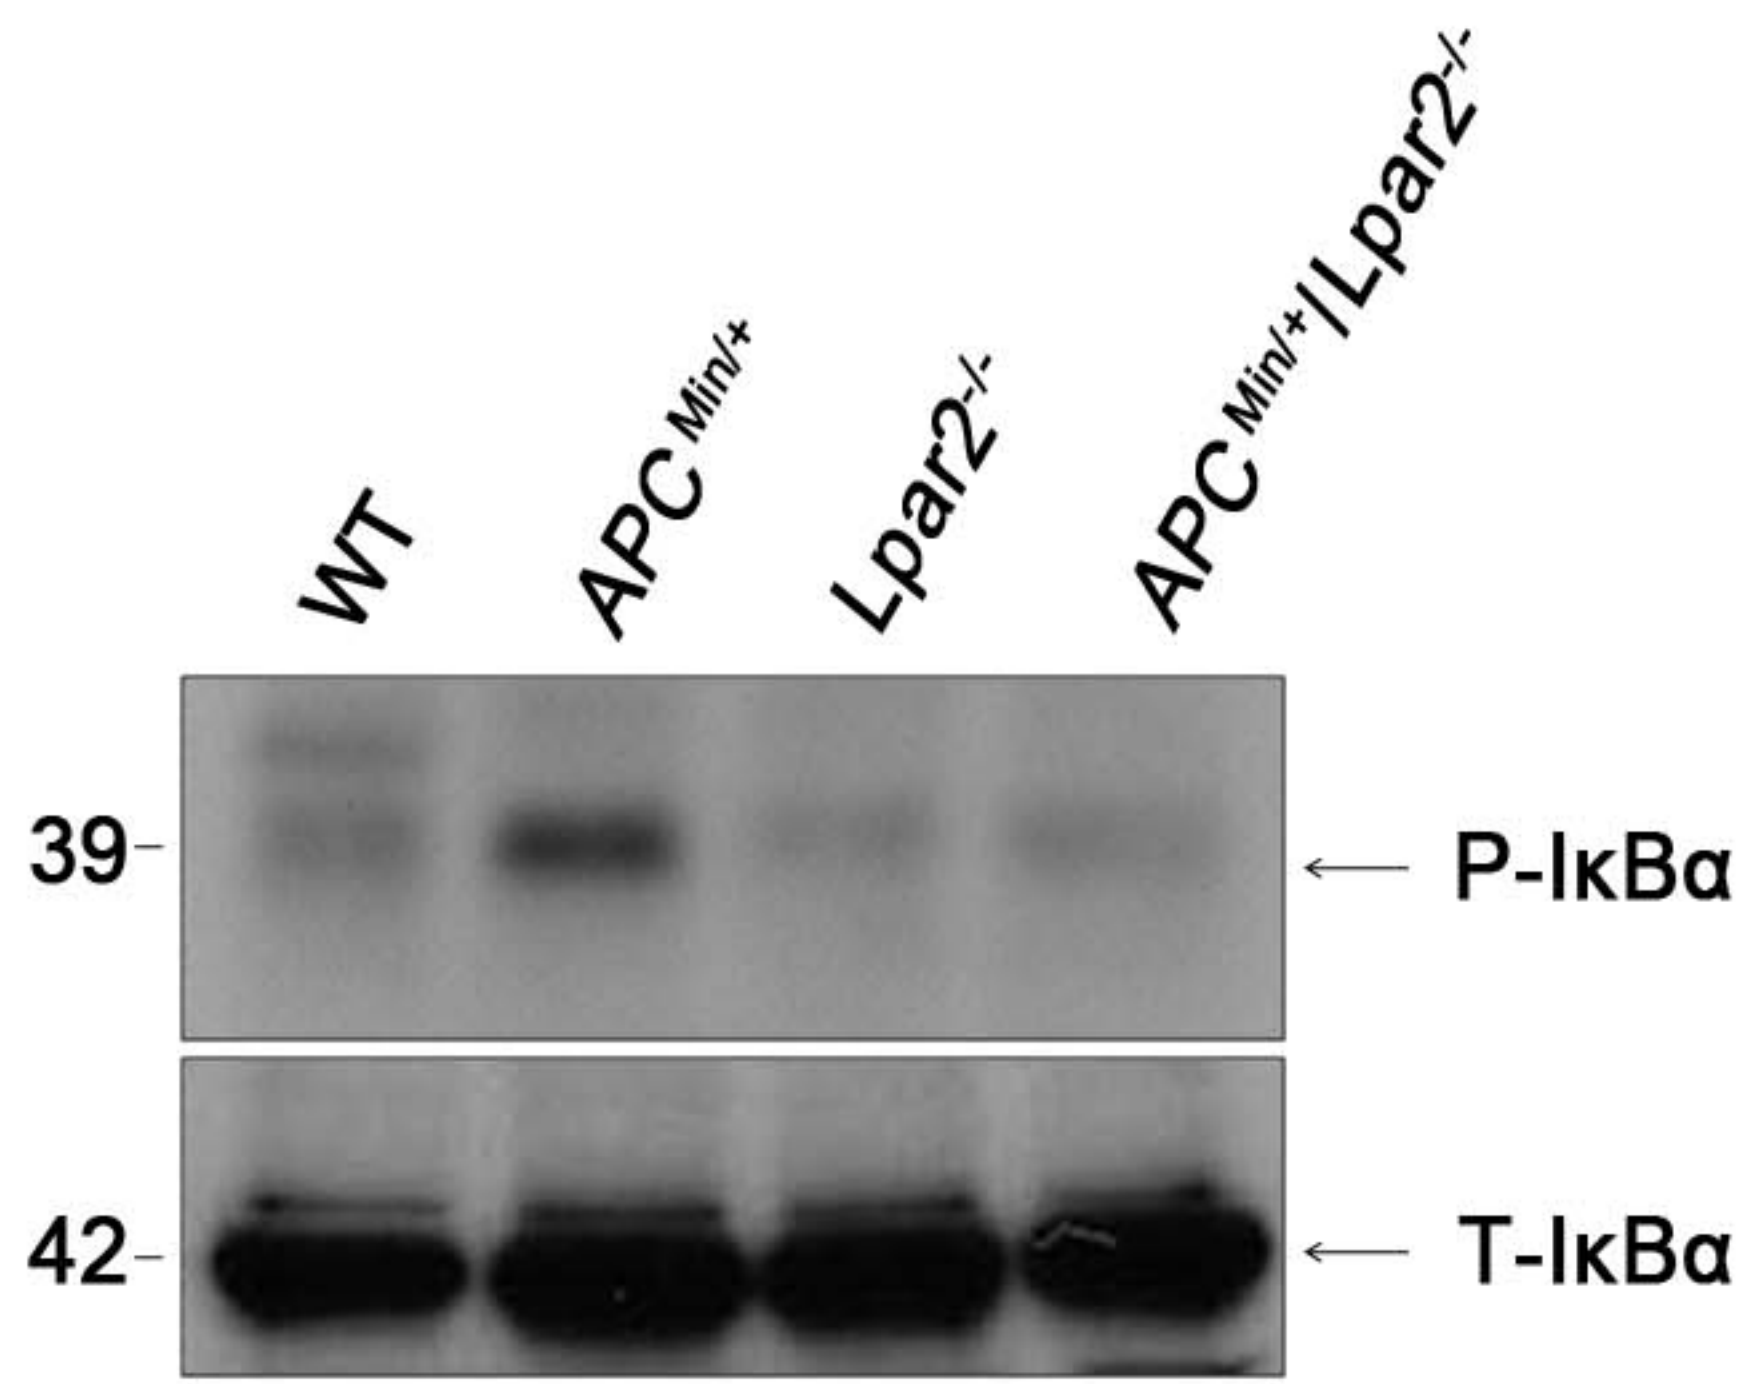**B**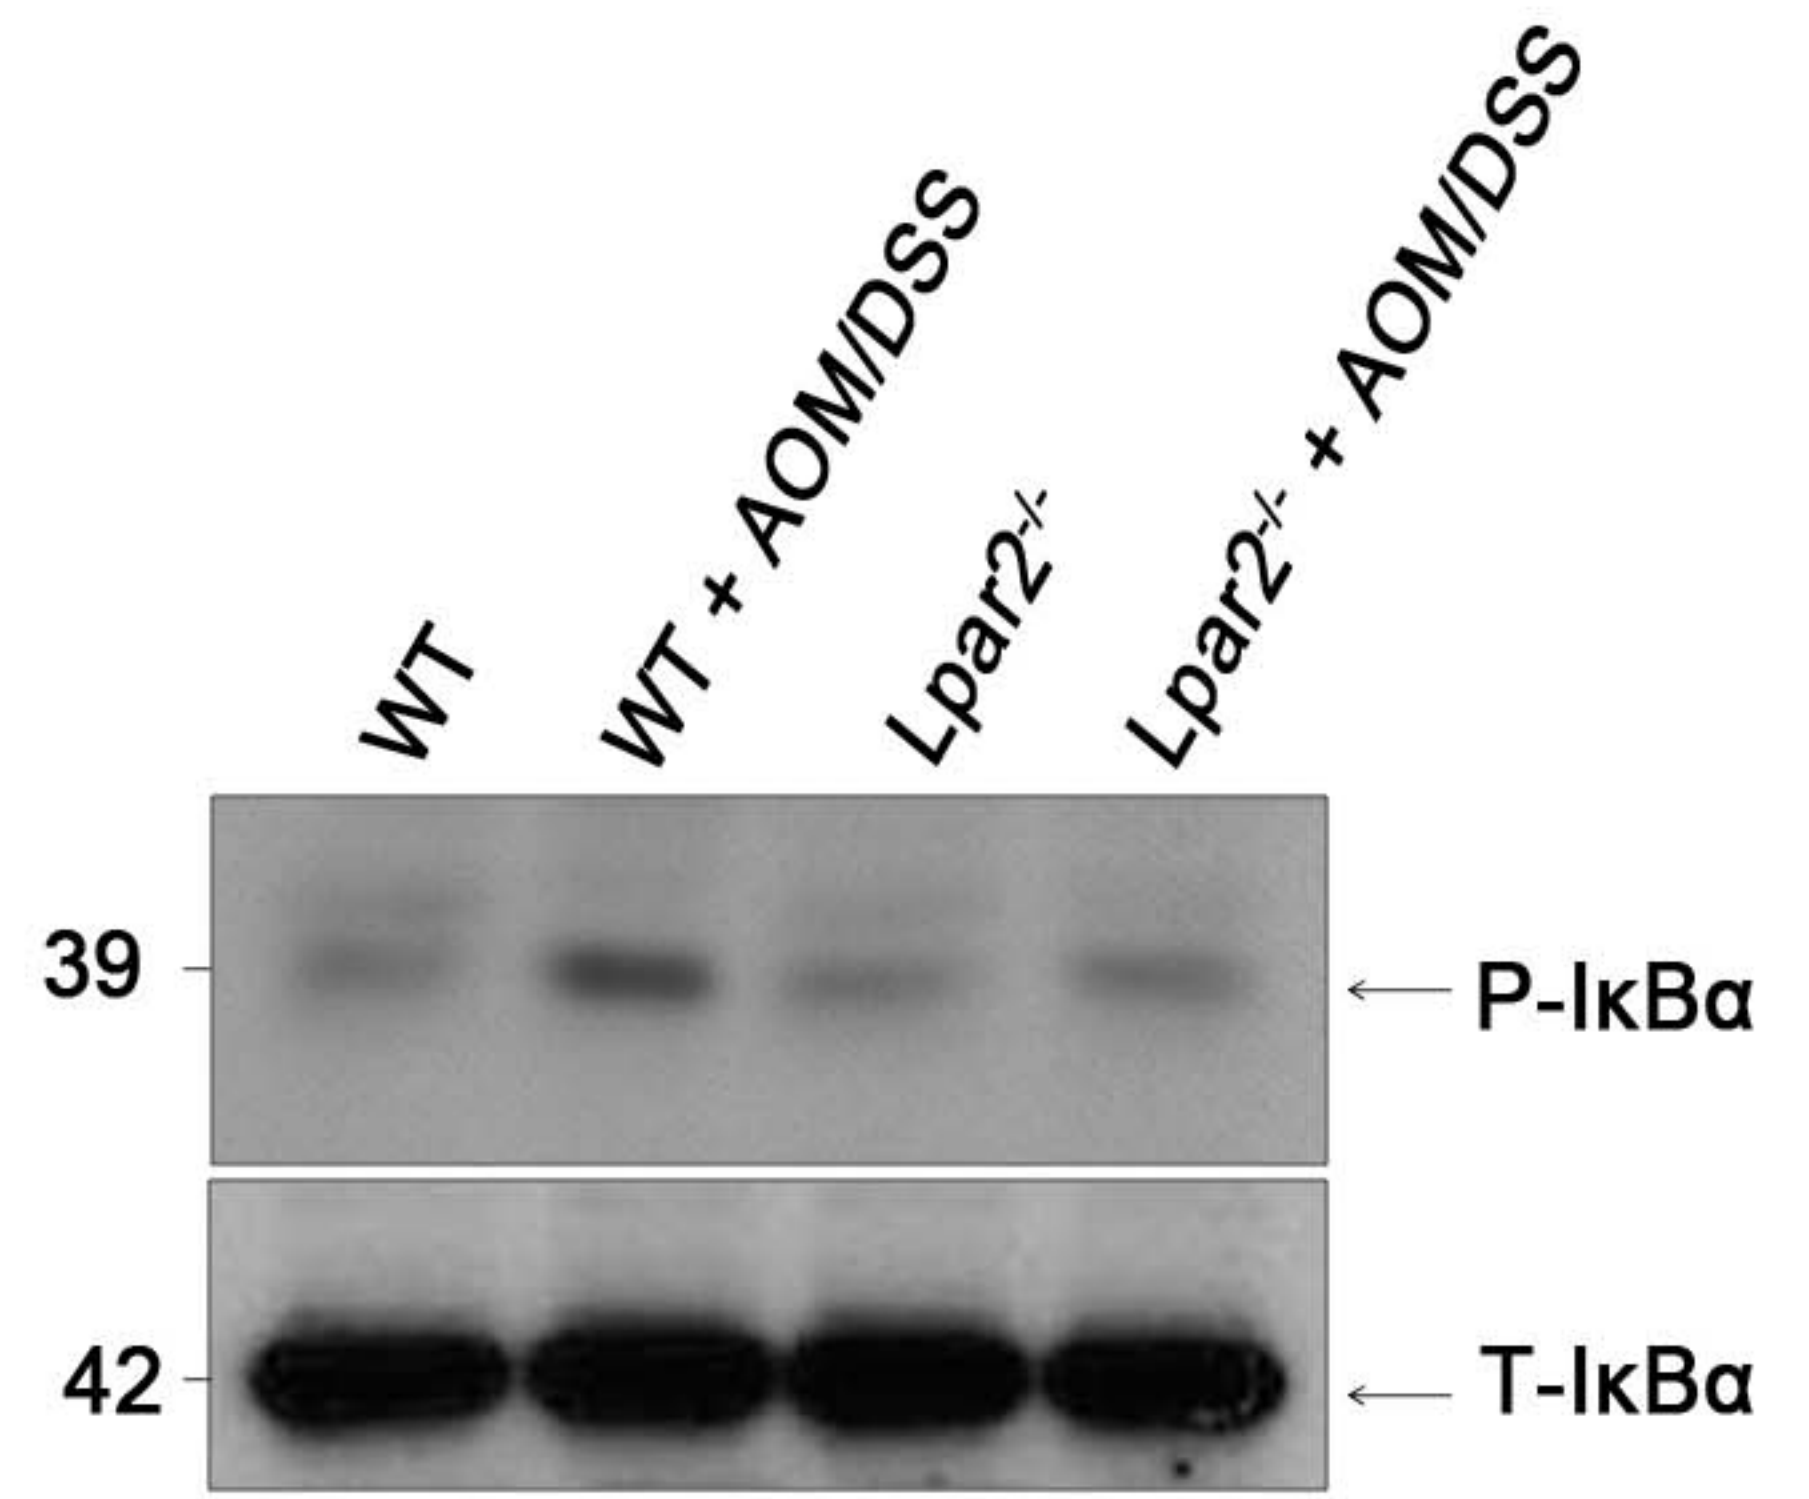**Supplementary Figure S6**
